# Supplementary material for: Redox induced colour changes between red-violet and blue in hetero-metal complexes of the type [CoII(4′-ferrocenyl-2,2′;6′2′′-terpyridine)2]X2 (X = counter anion)
Source: Royal Society of Chemistry journal article supplement (doi:10.1039/c5dt02592c), 2015-01-01
Supplement: c5dt02592c1.pdf [file c5dt02592c1.pdf]

### Supporting Information

**Redox induced color changes between red-violet and blue by redox in hetero-metal complexes of type  $[\text{Co}^{\text{II}}(4'\text{-ferrocenyl-2,2';6'2''-terpyridine})_2]\text{X}_2$  (X = counter anion)**

*Kohei Takami, Ryo Ohtani, Masaaki Nakamura, Takayuki Kurogi, Manabu Sugimoto, Leonard F. Lindoy and Shinya Hayami*

Corresponding author:

S. Hayami, hayami@sci.kumamoto-u.ac.jp

**Table S1** Selected Co- N bond length for **1** and **5** (Å)

|            | <b>1</b> ·2MeCN | <b>5</b> ·H <sub>2</sub> O·1.5Acetone |
|------------|-----------------|---------------------------------------|
| Co(1)-N(1) | 2.175(4)        | 1.942(7)                              |
| Co(1)-N(2) | 1.940(3)        | 1.839(7)                              |
| Co(1)-N(3) | 2.167(4)        | 1.922(7)                              |
| Co(1)-N(4) | 1.981(4)        | 1.937(5)                              |
| Co(1)-N(5) | 1.870(3)        | 1.848(7)                              |
| Co(1)-N(6) | 1.996(4)        | 1.959(5)                              |

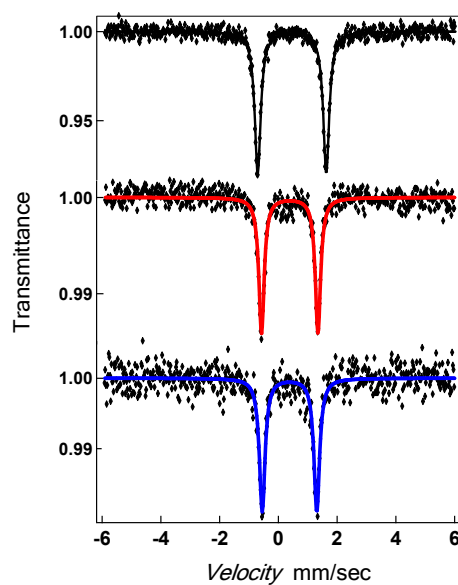

**Fig. S1** Mössbauer spectra of Fctpy (black), **1** (red) and **5** (blue) measured at room temperature.

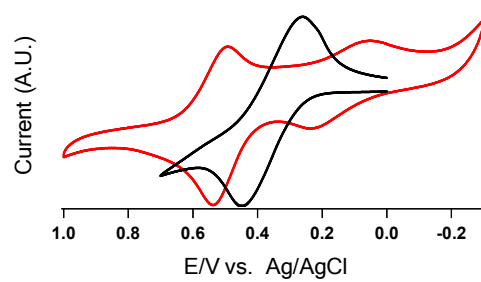

**Fig. S2** Cyclic voltammogram of **1** (red) and ferrocene (black) in the solid state.

181th MO  
[-0.39532]

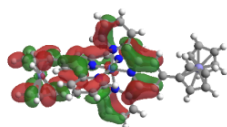

182th MO  
[-0.3946]

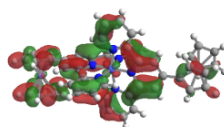

183th MO  
[-0.39328]

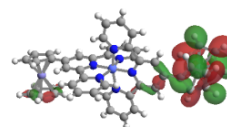

184th MO  
[-0.39226]

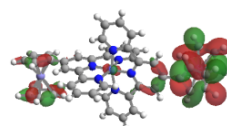

185th MO  
[-0.39143]

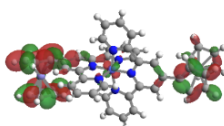

186th MO  
[-0.38231]

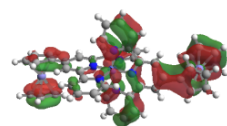

187th MO  
[-0.37984]

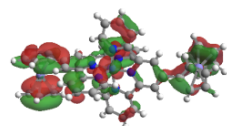

188th MO  
[-0.37633]

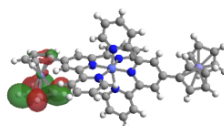

189th MO  
[-0.36951]

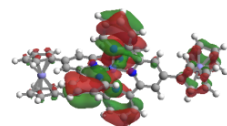

190th MO  
[-0.35652]

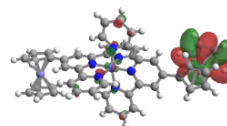

191th MO  
[-0.3544]

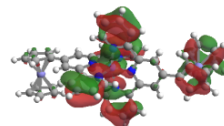

192th MO  
[-0.34762]

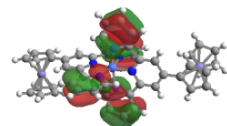

**Fig. S3** Molecular orbitals of **5** in CH<sub>3</sub>CN solution (Continued: 1/5).



193th MO  
[−0.3472]

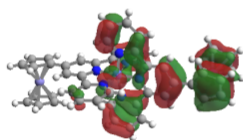

194th MO  
[−0.34551]

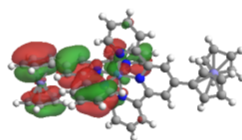

195th MO  
[−0.33563]

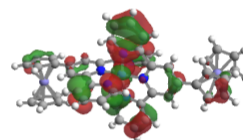

196th MO  
[−0.32399]

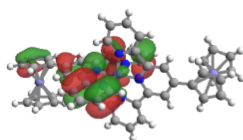

197th MO  
[−0.32263]

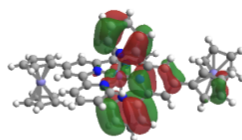

198th MO  
[−0.30704]

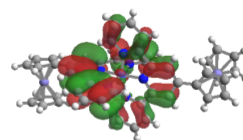

199th MO  
[−0.30384]

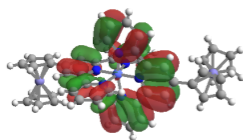

200th MO  
[−0.30136]

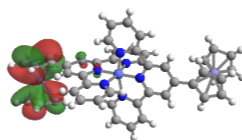

201th MO  
[−0.3006]

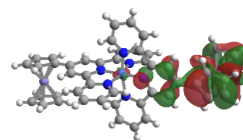

202th MO  
[−0.29553]

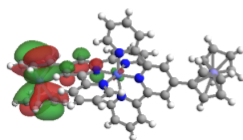

203th MO  
[−0.29512]

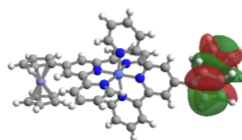

204th MO  
[−0.28038]

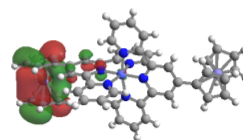

**Fig. S3** (Continued: 2/5).

205th MO  
[-0.27914]

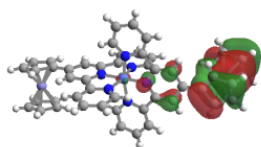

206th MO  
[-0.27421]

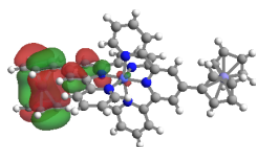

207th MO  
[-0.27008]

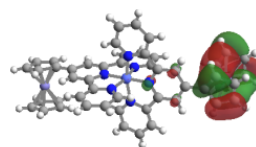

208th MO  
[-0.23756]

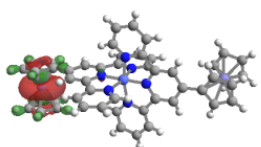

209th MO  
[-0.23396]

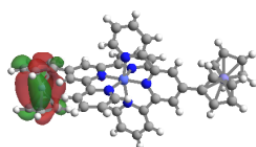

210th MO  
[-0.2326]

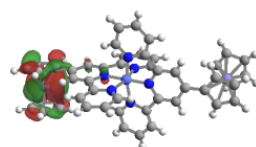

211th MO  
[-0.2323]

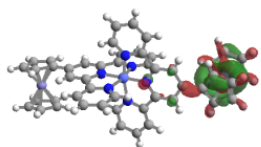

212th MO  
[-0.23118]

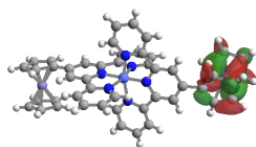

213th MO (HOMO)  
[-0.22798]

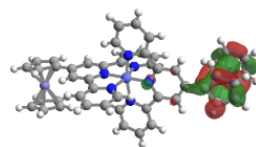

214th MO (LUMO)  
[-0.11809]

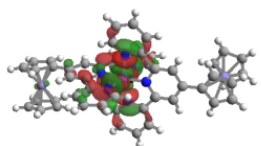

215th MO  
[-0.11705]

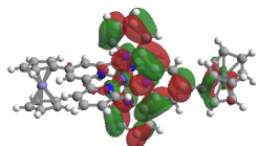

216th MO  
[-0.11584]

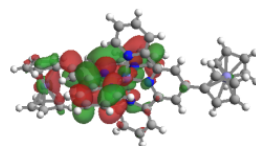

**Fig. S3** (Continued: 3/5).

217th MO  
[-0.10536]

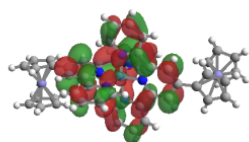

218th MO  
[-0.10302]

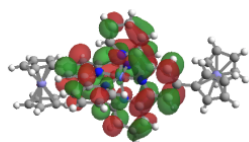

219th MO  
[-0.10027]

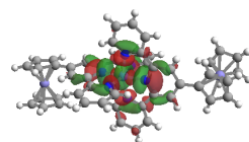

220th MO  
[-0.07128]

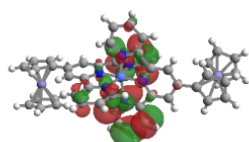

221th MO  
[-0.07002]

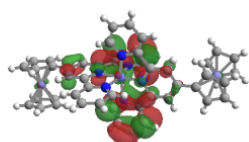

222th MO  
[-0.0681]

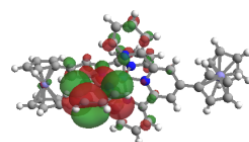

223th MO  
[-0.06535]

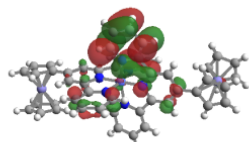

224th MO  
[-0.05115]

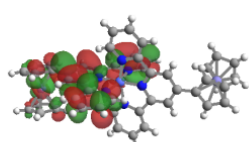

225th MO  
[-0.04984]

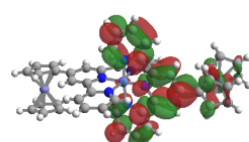

226th MO  
[-0.04779]

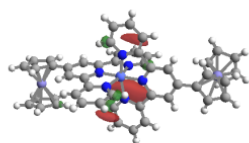

227th MO  
[-0.04038]

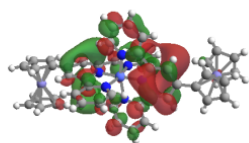

228th MO  
[-0.03275]

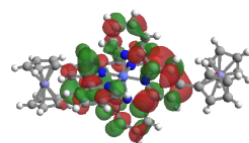

**Fig. S3** (Continued: 4/5).

229th MO  
[-0.02245]

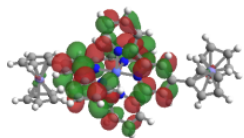

230th MO  
[-0.01801]

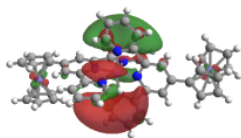

231th MO  
[-0.01379]

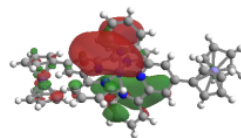

232th MO  
[-0.01333]

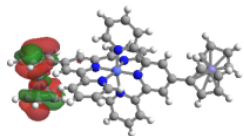

**Fig. S3** (Continued: 5/5).

181th MO  
[-0.37963]

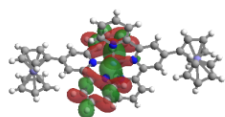

182th MO  
[-0.36261]

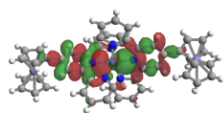

183th MO  
[-0.36004]

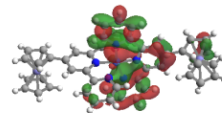

184th MO  
[-0.35788]

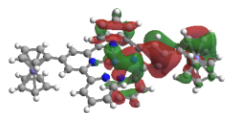

185th MO  
[-0.35379]

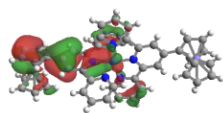

186th MO  
[-0.35272]

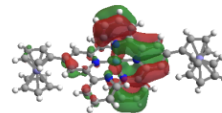

187th MO  
[-0.35073]

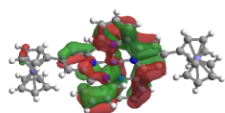

188th MO  
[-0.34901]

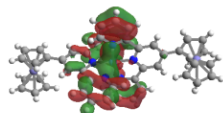

189th MO  
[-0.34502]

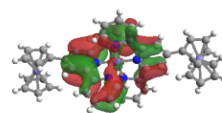

190th MO  
[-0.32922]

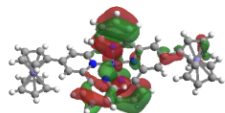

191th MO  
[-0.32554]

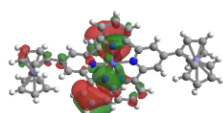

192th MO  
[-0.32261]

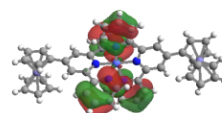

**Fig. S4** Alpha molecular orbitals of **1** in the CH<sub>3</sub>CN solution (Continued: 1/6).

193th MO  
[-0.31078]

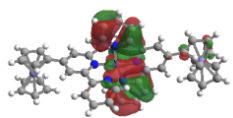

194th MO  
[-0.30507]

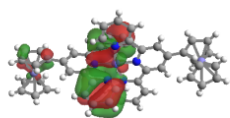

195th MO  
[-0.29738]

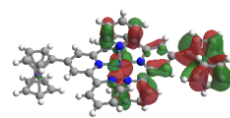

196th MO  
[-0.29654]

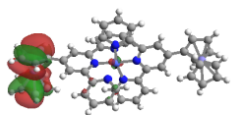

197th MO  
[-0.29598]

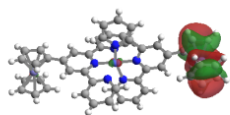

198th MO  
[-0.29542]

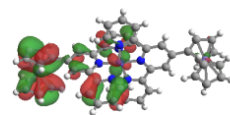

199th MO  
[-0.29349]

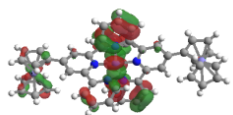

200th MO  
[-0.28674]

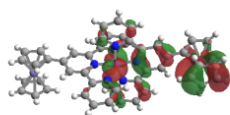

201th MO  
[-0.28405]

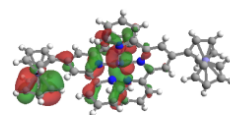

202th MO  
[-0.27656]

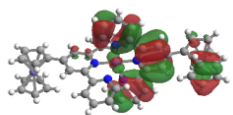

203th MO  
[-0.27391]

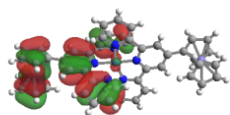

204th MO  
[-0.27051]

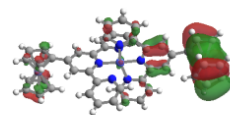

**Fig. S4** (Continued: 2/6).

205th MO  
[-0.27003]

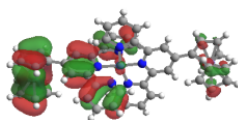

206th MO  
[-0.26175]

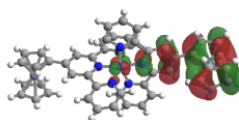

207th MO  
[-0.26127]

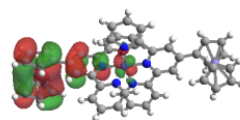

208th MO  
[-0.22912]

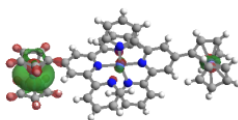

209th MO  
[-0.22898]

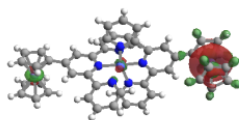

210th MO  
[-0.22783]

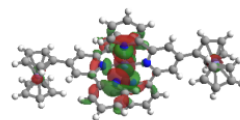

211th MO  
[-0.22356]

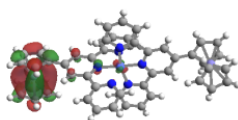

212th MO  
[-0.22316]

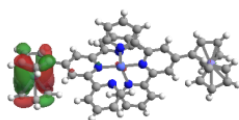

213th MO  
[-0.22312]

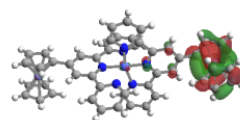

214th MO (HOMO)  
[-0.22244]

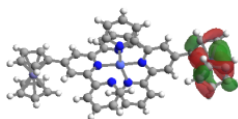

215th MO (LUMO)  
[-0.09604]

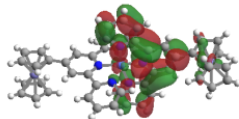

216th MO  
[-0.09012]

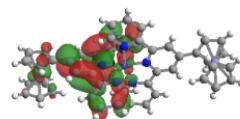

**Fig. S4** (Continued: 3/6).

217th MO  
[-0.08384]

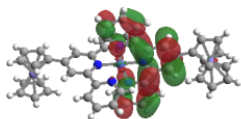

218th MO  
[-0.0779]

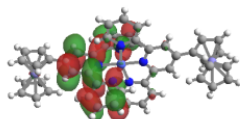

219th MO  
[-0.06474]

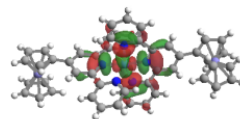

220th MO  
[-0.05014]

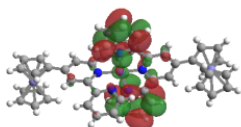

221th MO  
[-0.04984]

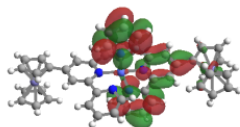

222th MO  
[-0.04512]

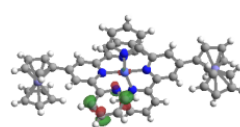

223th MO  
[-0.04294]

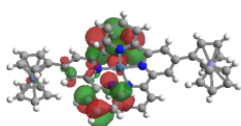

224th MO  
[-0.04193]

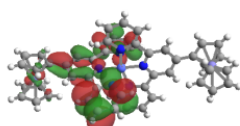

225th MO  
[-0.03867]

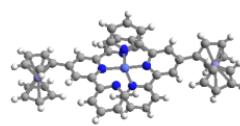

226th MO  
[-0.03374]

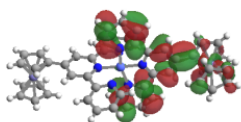

227th MO  
[-0.0307]

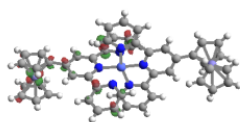

228th MO  
[-0.0304]

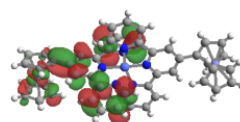

**Fig. S4** (Continued: 4/6).



229th MO  
[-0.01538]

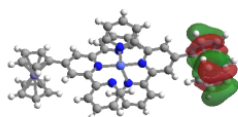

230th MO  
[-0.01433]

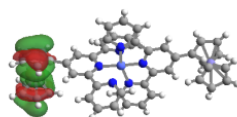

231th MO  
[-0.00747]

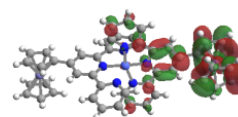

232th MO  
[-0.00723]

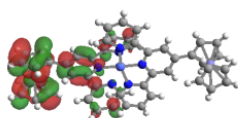

233th MO  
[0.00265]

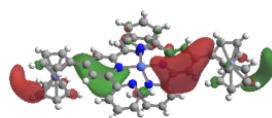

234th MO  
[0.0042]

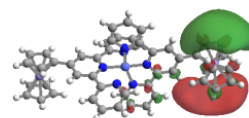

235th MO  
[0.00448]

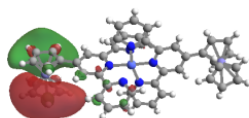

236th MO  
[0.01169]

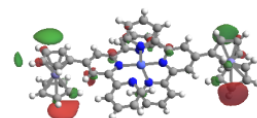

237th MO  
[0.01486]

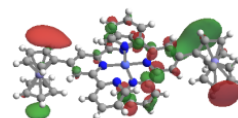

238th MO  
[0.01556]

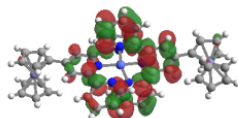

239th MO  
[0.01965]

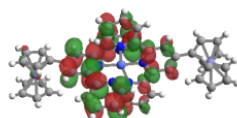

240th MO  
[0.02626]

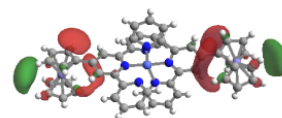

**Fig. S4** (Continued: 5/6).

241th MO  
[0.03084]

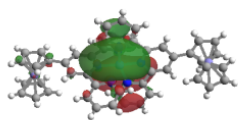

242th MO  
[0.03291]

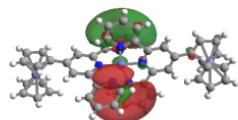

243th MO  
[0.04809]

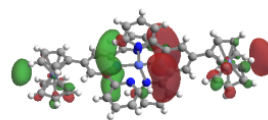

244th MO  
[0.05888]

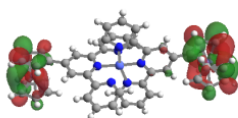

245th MO  
[0.05909]

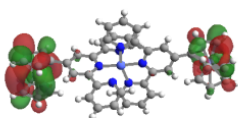

246th MO  
[0.06106]

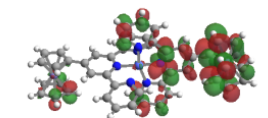

247th MO  
[0.06227]

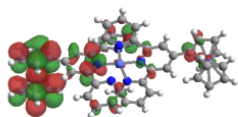

248th MO  
[0.06466]

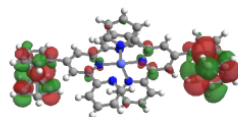

**Fig. S4** (Continued: 6/6).

187th MO  
[-0.34529]

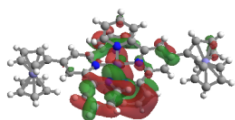

188th MO  
[-0.3433]

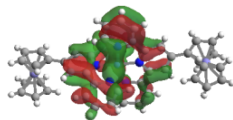

189th MO  
[-0.34202]

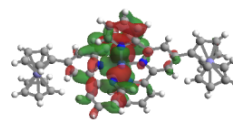

190th MO  
[-0.32615]

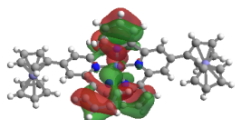

191th MO  
[-0.32352]

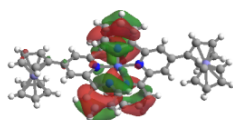

192th MO  
[-0.32162]

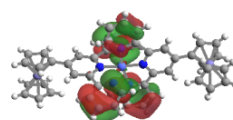

**Fig. S5** Beta molecular orbitals of **1** in the CH<sub>3</sub>CN solution (Continued: 1/6).

193th MO  
[-0.30813]

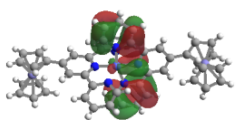

194th MO  
[-0.30306]

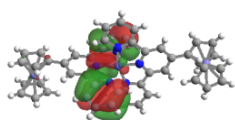

195th MO  
[-0.29654]

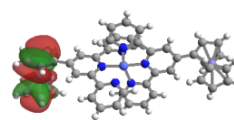

196th MO  
[-0.29614]

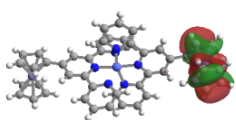

197th MO  
[-0.29442]

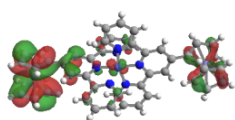

198th MO  
[-0.29426]

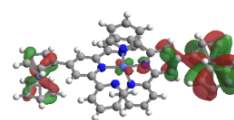

199th MO  
[-0.27889]

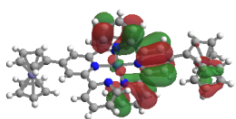

200th MO  
[-0.27462]

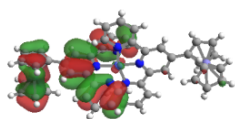

201th MO  
[-0.27451]

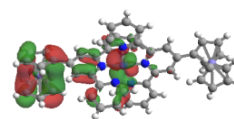

202th MO  
[-0.27126]

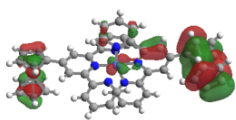

203th MO  
[-0.2703]

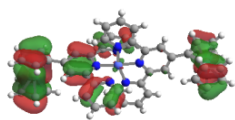

204th MO  
[-0.26965]

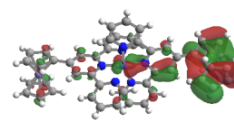

**Fig. S5** (Continued: 2/6).

205th MO  
[-0.2571]

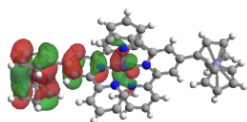

206th MO  
[-0.24504]

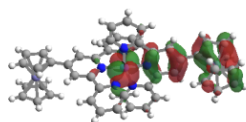

207th MO  
[-0.23854]

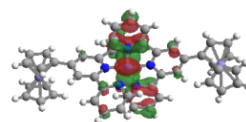

208th MO  
[-0.22911]

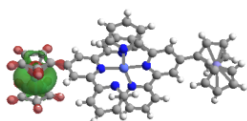

209th MO  
[-0.22901]

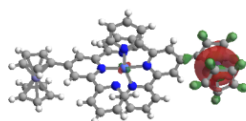

210th MO  
[-0.22359]

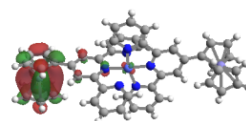

211th MO  
[-0.22319]

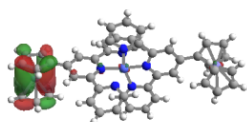

212th MO  
[-0.22303]

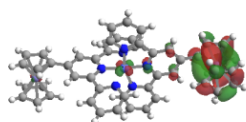

213th MO (HOMO)  
[-0.22267]

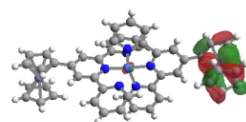

214th MO (LUMO)  
[-0.09483]

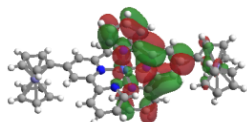

215th MO  
[-0.08949]

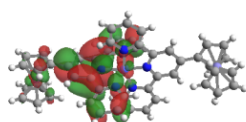

216th MO  
[-0.08312]

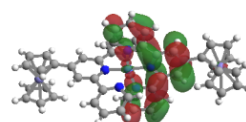

Fig. S5 (Continued: 3/6).

217th MO  
[-0.07726]

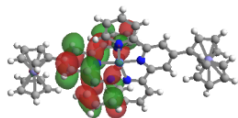

218th MO  
[-0.05085]

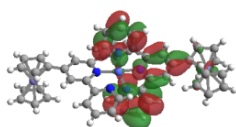

219th MO  
[-0.04967]

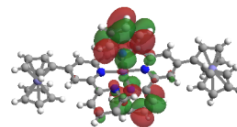

220th MO  
[-0.04527]

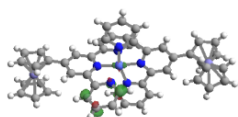

221th MO  
[-0.04227]

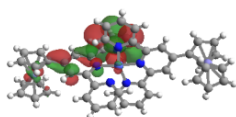

222th MO  
[-0.04159]

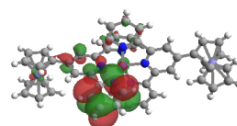

223th MO  
[-0.03867]

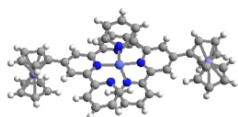

224th MO  
[-0.03437]

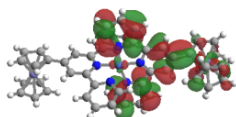

225th MO  
[-0.03115]

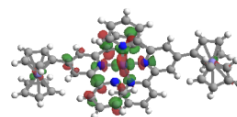

226th MO  
[-0.03067]

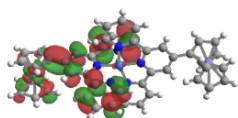

227th MO  
[-0.02817]

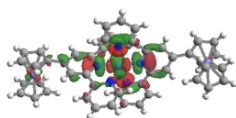

228th MO  
[-0.01554]

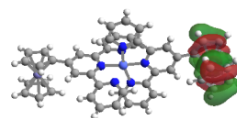

Fig. S5 (Continued: 4/6).

229th MO  
[−0.01435]

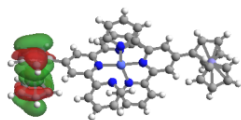

230th MO  
[−0.00771]

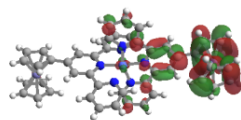

231th MO  
[−0.00724]

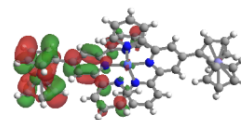

232th MO  
[−0.00415]

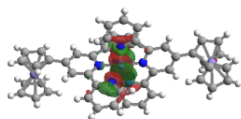

233th MO  
[0.00329]

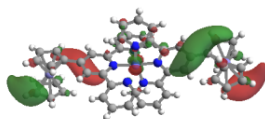

234th MO  
[0.00427]

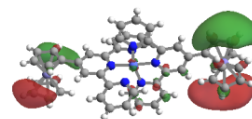

235th MO  
[0.00482]

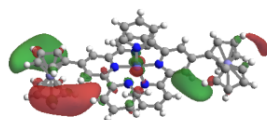

236th MO  
[0.01172]

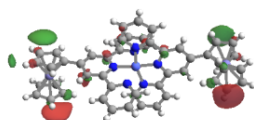

237th MO  
[0.01474]

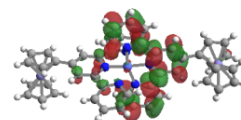

238th MO  
[0.01529]

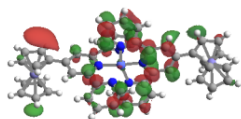

239th MO  
[0.01934]

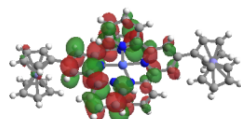

240th MO  
[0.02627]

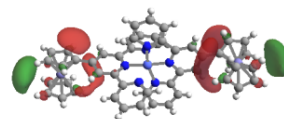

Fig. S5 (Continued: 5/6).

241th MO  
[0.03114]

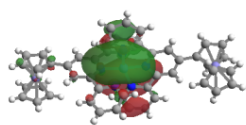

242th MO  
[0.03311]

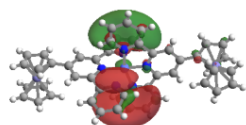

243th MO  
[0.04881]

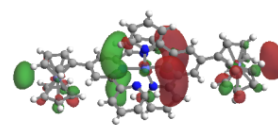

244th MO  
[0.0588]

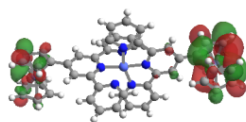

245th MO  
[0.05906]

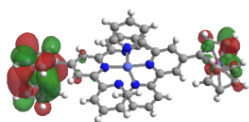

246th MO  
[0.06104]

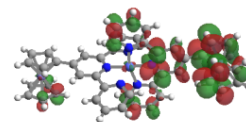

247th MO  
[0.06229]

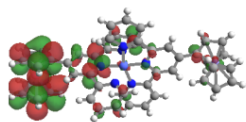

248th MO  
[0.06462]

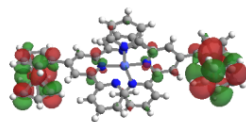

**Fig. S5** (Continued: 6/6).



**Table S2** Spin-singlet excited states of **Co<sup>II</sup>(Fctpy)<sub>2</sub>** in CH<sub>3</sub>CN calculated by using the TDDFT method. The solvent effect was taken into account by the PCM method.  $\Delta E$ ,  $\lambda$ , and  $f$  are excitation energy, excitation wavelength, and oscillator strength, respectively.

| State | $\Delta E$ (eV) | $\lambda$ (nm) | $f$    | Configuration |   |           | Coefficient |
|-------|-----------------|----------------|--------|---------------|---|-----------|-------------|
|       |                 |                |        | Occ. MO       |   | Unocc. MO |             |
| 1     | 0.519           | 2390.0         | 0.0002 | 130A          | → | 135A      | 0.953       |
|       |                 |                |        | 130A          | ← | 135A      | -0.241      |
|       |                 |                |        | 111A          | → | 135A      | 0.219       |
|       |                 |                |        | 130A          | → | 132A      | 0.207       |
|       |                 |                |        | 109A          | → | 135A      | -0.109      |
|       |                 |                |        | 110A          | → | 135A      | 0.102       |
| 2     | 0.881           | 1408.0         | 0.0000 | 129B          | → | 139B      | 0.790       |
|       |                 |                |        | 125A          | → | 135A      | -0.420      |
|       |                 |                |        | 129B          | → | 138B      | -0.182      |
|       |                 |                |        | 115A          | → | 135A      | -0.138      |
|       |                 |                |        | 128A          | → | 135A      | -0.127      |
|       |                 |                |        | 129B          | → | 140B      | 0.120       |
|       |                 |                |        | 116A          | → | 135A      | -0.111      |
|       |                 |                |        | 125A          | ← | 135A      | -0.102      |
|       |                 |                |        | 128B          | → | 139B      | 0.762       |
|       |                 |                |        | 126A          | → | 135A      | -0.425      |
| 3     | 1.025           | 1210.2         | 0.0000 | 128B          | → | 138B      | -0.188      |
|       |                 |                |        | 123A          | → | 135A      | -0.163      |
|       |                 |                |        | 117A          | → | 135A      | -0.133      |
|       |                 |                |        | 128B          | → | 140B      | 0.126       |
|       |                 |                |        | 114A          | → | 135A      | -0.121      |
|       |                 |                |        | 128B          | → | 142B      | -0.107      |
|       |                 |                |        | 128B          | → | 131B      | 0.105       |
|       |                 |                |        | 127A          | → | 135A      | 0.651       |
|       |                 |                |        | 127B          | → | 139B      | -0.470      |
|       |                 |                |        | 129B          | → | 142B      | -0.328      |
| 4     | 1.283           | 966.1          | 0.0000 | 124A          | → | 135A      | 0.252       |
|       |                 |                |        | 118A          | → | 135A      | -0.148      |
|       |                 |                |        | 128A          | → | 135A      | -0.137      |
|       |                 |                |        | 127A          | → | 132A      | 0.135       |
|       |                 |                |        | 119A          | → | 135A      | -0.117      |
|       |                 |                |        | 113A          | → | 135A      | 0.111       |
|       |                 |                |        | 127B          | → | 138B      | 0.107       |
|       |                 |                |        | 129B          | → | 142B      | 0.869       |
|       |                 |                |        | 127A          | → | 135A      | 0.235       |
|       |                 |                |        | 127B          | → | 139B      | -0.182      |
| 5     | 1.298           | 954.9          | 0.0000 | 129B          | → | 145B      | 0.156       |
|       |                 |                |        | 125A          | → | 135A      | 0.132       |
|       |                 |                |        | 124A          | → | 135A      | 0.106       |
|       |                 |                |        | 125B          | → | 142B      | -0.105      |
|       |                 |                |        | 128B          | → | 142B      | 0.646       |
|       |                 |                |        | 126A          | → | 135A      | -0.535      |

|    |       |       |        |      |   |      |        |
|----|-------|-------|--------|------|---|------|--------|
| 7  | 1.733 | 715.3 | 0.0004 | 128B | → | 139B | -0.262 |
|    |       |       |        | 123A | → | 135A | -0.196 |
|    |       |       |        | 117A | → | 135A | -0.153 |
|    |       |       |        | 114A | → | 135A | -0.142 |
|    |       |       |        | 128B | → | 145B | 0.115  |
|    |       |       |        | 126A | → | 132A | -0.112 |
|    |       |       |        | 128B | → | 138B | 0.111  |
|    |       |       |        | 128B | → | 131B | -0.110 |
|    |       |       |        | 128B | ← | 139B | 0.104  |
|    |       |       |        | 127B | → | 139B | 0.716  |
|    |       |       |        | 127A | → | 135A | 0.502  |
|    |       |       |        | 124A | → | 135A | 0.187  |
|    |       |       |        | 127B | → | 138B | -0.158 |
|    |       |       |        | 127B | → | 142B | 0.154  |
|    |       |       |        | 124B | → | 139B | -0.141 |
|    |       |       |        | 127A | ← | 135A | -0.140 |
|    |       |       |        | 128A | → | 135A | -0.117 |
|    |       |       |        | 118A | → | 135A | -0.111 |
|    |       |       |        | 116B | → | 139B | -0.110 |
|    |       |       |        | 127B | → | 140B | 0.103  |
|    |       |       |        | 127A | → | 132A | 0.102  |
|    |       |       |        | 127B | ← | 139B | -0.100 |
| 8  | 2.116 | 586.0 | 0.0001 | 125A | → | 135A | 0.725  |
|    |       |       |        | 129B | → | 139B | 0.485  |
|    |       |       |        | 128A | → | 135A | 0.214  |
|    |       |       |        | 115A | → | 135A | 0.207  |
|    |       |       |        | 129B | ← | 139B | -0.197 |
|    |       |       |        | 116A | → | 135A | 0.165  |
|    |       |       |        | 129A | → | 135A | 0.156  |
|    |       |       |        | 125A | → | 132A | 0.155  |
|    |       |       |        | 129B | → | 131B | 0.138  |
|    |       |       |        | 125A | ← | 135A | -0.133 |
|    |       |       |        | 129B | → | 138B | -0.125 |
|    |       |       |        | 128B | → | 142B | 0.592  |
| 9  | 2.246 | 552.1 | 0.0002 | 126A | → | 135A | 0.442  |
|    |       |       |        | 128B | → | 139B | 0.411  |
|    |       |       |        | 130A | → | 131A | -0.393 |
|    |       |       |        | 123A | → | 135A | 0.159  |
|    |       |       |        | 117A | → | 135A | 0.117  |
|    |       |       |        | 114A | → | 135A | 0.110  |
|    |       |       |        | 128B | ← | 139B | -0.105 |
|    |       |       |        | 128B | → | 145B | 0.104  |
|    |       |       |        | 130A | → | 131A | 0.901  |
|    |       |       |        | 128B | → | 142B | 0.289  |
| 10 | 2.367 | 523.9 | 0.0030 | 128B | → | 139B | 0.169  |
|    |       |       |        | 126A | → | 135A | 0.162  |
|    |       |       |        | 130A | → | 132A | 0.114  |
|    |       |       |        | 130A | → | 132A | 0.863  |
|    |       |       |        | 130A | → | 132A | 0.863  |
| 11 | 2.400 | 516.6 | 0.0020 | 130A | → | 132A | 0.863  |

|    |       |       |        |      |   |      |        |
|----|-------|-------|--------|------|---|------|--------|
|    |       |       |        | 127B | → | 142B | 0.351  |
|    |       |       |        | 130A | → | 135A | -0.184 |
|    |       |       |        | 129B | → | 130B | -0.161 |
|    |       |       |        | 130A | → | 131A | -0.108 |
| 12 | 2.468 | 502.4 | 0.0044 | 129B | → | 130B | 0.956  |
|    |       |       |        | 130A | → | 132A | 0.151  |
| 13 | 2.628 | 471.8 | 0.0007 | 127B | → | 142B | 0.764  |
|    |       |       |        | 130A | → | 132A | -0.354 |
|    |       |       |        | 128B | → | 130B | 0.284  |
|    |       |       |        | 127B | → | 131B | -0.154 |
|    |       |       |        | 124B | → | 142B | -0.148 |
|    |       |       |        | 127B | → | 145B | 0.133  |
|    |       |       |        | 116B | → | 142B | -0.110 |
|    |       |       |        | 127B | → | 139B | -0.101 |
|    |       |       |        | 126B | → | 142B | -0.101 |
| 14 | 2.646 | 468.6 | 0.0080 | 128B | → | 130B | 0.730  |
|    |       |       |        | 127B | → | 142B | -0.266 |
|    |       |       |        | 125B | → | 132B | 0.244  |
|    |       |       |        | 129B | → | 132B | 0.235  |
|    |       |       |        | 126A | → | 131A | -0.231 |
|    |       |       |        | 128A | → | 133A | -0.221 |
|    |       |       |        | 130A | → | 132A | 0.181  |
|    |       |       |        | 128A | → | 131A | -0.140 |
| 15 | 2.795 | 443.7 | 0.0008 | 129B | → | 131B | 0.944  |
|    |       |       |        | 129B | → | 139B | -0.134 |
|    |       |       |        | 130A | → | 133A | 0.111  |
|    |       |       |        | 129A | → | 132A | -0.104 |
|    |       |       |        | 126B | → | 131B | 0.101  |
|    |       |       |        | 129B | → | 142B | 0.101  |
| 16 | 2.840 | 436.6 | 0.0006 | 130A | → | 133A | 0.900  |
|    |       |       |        | 130A | → | 134A | -0.362 |
|    |       |       |        | 129B | → | 131B | -0.122 |
| 17 | 2.937 | 422.1 | 0.0004 | 129A | → | 134A | 0.476  |
|    |       |       |        | 126B | → | 133B | -0.465 |
|    |       |       |        | 127B | → | 131B | -0.359 |
|    |       |       |        | 127A | → | 132A | 0.273  |
|    |       |       |        | 129B | → | 133B | -0.255 |
|    |       |       |        | 124B | → | 131B | -0.167 |
|    |       |       |        | 129A | → | 132A | 0.129  |
|    |       |       |        | 124A | → | 132A | -0.122 |
|    |       |       |        | 121A | → | 132A | 0.116  |
|    |       |       |        | 124A | → | 142A | 0.109  |
|    |       |       |        | 121B | → | 131B | -0.106 |
|    |       |       |        | 124B | → | 141B | 0.105  |
| 18 | 2.966 | 418.1 | 0.0005 | 130A | → | 134A | 0.899  |
|    |       |       |        | 130A | → | 133A | 0.374  |
| 19 | 2.994 | 414.1 | 0.0135 | 129B | → | 132B | 0.592  |
|    |       |       |        | 128B | → | 130B | -0.479 |

|    |       |       |        |      |   |      |        |
|----|-------|-------|--------|------|---|------|--------|
| 20 | 3.083 | 402.2 | 0.0001 | 128A | → | 133A | -0.368 |
|    |       |       |        | 125B | → | 132B | 0.262  |
|    |       |       |        | 123A | → | 131A | 0.146  |
|    |       |       |        | 128A | → | 131A | -0.134 |
|    |       |       |        | 123B | → | 130B | -0.131 |
|    |       |       |        | 125B | → | 130B | 0.126  |
|    |       |       |        | 128B | → | 131B | 0.957  |
| 21 | 3.163 | 392.0 | 0.0003 | 127B | → | 130B | 0.145  |
|    |       |       |        | 128B | → | 139B | -0.101 |
|    |       |       |        | 128A | → | 131A | 0.556  |
|    |       |       |        | 129B | → | 132B | 0.453  |
|    |       |       |        | 125B | → | 130B | -0.406 |
|    |       |       |        | 128B | → | 132B | -0.319 |
|    |       |       |        | 127B | → | 130B | 0.171  |
| 22 | 3.232 | 383.6 | 0.0002 | 129B | → | 130B | 0.128  |
|    |       |       |        | 123A | → | 133A | -0.125 |
|    |       |       |        | 123B | → | 132B | 0.125  |
|    |       |       |        | 128B | → | 130B | 0.117  |
|    |       |       |        | 129A | → | 132A | 0.607  |
|    |       |       |        | 126B | → | 131B | -0.553 |
|    |       |       |        | 124B | → | 133B | -0.194 |
| 23 | 3.281 | 377.9 | 0.0001 | 124A | → | 134A | -0.180 |
|    |       |       |        | 129B | → | 131B | 0.170  |
|    |       |       |        | 127B | → | 130B | -0.148 |
|    |       |       |        | 129B | → | 133B | 0.129  |
|    |       |       |        | 129A | → | 134A | -0.128 |
|    |       |       |        | 126B | → | 133B | 0.120  |
|    |       |       |        | 127A | → | 134A | 0.119  |
| 24 | 3.299 | 375.8 | 0.0016 | 127B | → | 130B | 0.834  |
|    |       |       |        | 129B | → | 132B | -0.273 |
|    |       |       |        | 128A | → | 133A | -0.187 |
|    |       |       |        | 125B | → | 132B | 0.180  |
|    |       |       |        | 129B | → | 133B | 0.132  |
|    |       |       |        | 128B | → | 131B | -0.131 |
|    |       |       |        | 126A | → | 131A | -0.122 |
| 25 | 3.363 | 368.6 | 0.0129 | 128B | → | 130B | -0.104 |
|    |       |       |        | 127B | → | 130B | 0.405  |
|    |       |       |        | 128B | → | 132B | 0.387  |
|    |       |       |        | 129B | → | 132B | 0.372  |
|    |       |       |        | 128A | → | 133A | 0.312  |
|    |       |       |        | 125B | → | 132B | -0.308 |
|    |       |       |        | 129B | → | 133B | -0.227 |
|    |       |       |        | 128A | → | 131A | -0.214 |
|    |       |       |        | 126A | → | 131A | 0.205  |
|    |       |       |        | 128B | → | 130B | 0.158  |
|    |       |       |        | 125B | → | 130B | 0.154  |
|    |       |       |        | 126A | → | 133A | -0.102 |
|    |       |       |        | 128B | → | 132B | 0.809  |

|    |       |       |        |      |   |      |        |
|----|-------|-------|--------|------|---|------|--------|
| 26 | 3.390 | 365.8 | 0.0122 | 125B | → | 130B | -0.278 |
|    |       |       |        | 128A | → | 131A | 0.275  |
|    |       |       |        | 128B | → | 133B | -0.173 |
|    |       |       |        | 123B | → | 132B | 0.124  |
|    |       |       |        | 128B | → | 134B | 0.111  |
|    |       |       |        | 123A | → | 133A | -0.108 |
|    |       |       |        | 127B | → | 130B | -0.107 |
|    |       |       |        | 128A | → | 133A | -0.105 |
|    |       |       |        | 129B | → | 133B | 0.771  |
|    |       |       |        | 127B | → | 131B | -0.372 |
|    |       |       |        | 129B | → | 132B | 0.271  |
|    |       |       |        | 127A | → | 132A | 0.231  |
|    |       |       |        | 125B | → | 132B | -0.123 |
| 27 | 3.518 | 352.4 | 0.0015 | 128A | → | 133A | 0.122  |
|    |       |       |        | 127B | → | 131B | 0.643  |
|    |       |       |        | 129B | → | 133B | 0.435  |
|    |       |       |        | 129A | → | 134A | 0.341  |
|    |       |       |        | 126B | → | 133B | -0.288 |
|    |       |       |        | 127A | → | 132A | -0.159 |
|    |       |       |        | 124A | → | 132A | -0.145 |
|    |       |       |        | 124B | → | 131B | -0.144 |
|    |       |       |        | 128B | → | 133B | 0.102  |
|    |       |       |        | 128B | → | 133B | 0.942  |
| 28 | 3.653 | 339.4 | 0.0003 | 128B | → | 132B | 0.173  |
|    |       |       |        | 128B | → | 136B | 0.103  |
|    |       |       |        | 128B | → | 136B | 0.103  |
| 29 | 3.739 | 331.6 | 0.0024 | 130A | → | 136A | 0.842  |
|    |       |       |        | 127A | → | 131A | -0.415 |
|    |       |       |        | 130A | → | 138A | -0.157 |
|    |       |       |        | 125B | → | 130B | 0.131  |
|    |       |       |        | 128A | → | 131A | 0.120  |
|    |       |       |        | 130A | → | 133A | 0.108  |
|    |       |       |        | 127A | → | 131A | 0.629  |
| 30 | 3.775 | 328.4 | 0.0157 | 130A | → | 136A | 0.433  |
|    |       |       |        | 125B | → | 130B | -0.365 |
|    |       |       |        | 125A | → | 131A | -0.242 |
|    |       |       |        | 128A | → | 131A | -0.241 |
|    |       |       |        | 130A | → | 138A | -0.132 |
|    |       |       |        | 129A | → | 131A | -0.117 |
|    |       |       |        | 124A | → | 131A | 0.109  |
|    |       |       |        | 129B | → | 135B | -0.109 |
|    |       |       |        | 126A | → | 131A | 0.475  |
|    |       |       |        | 129B | → | 135B | -0.408 |
| 31 | 3.801 | 326.2 | 0.0107 | 129B | → | 134B | 0.251  |
|    |       |       |        | 128A | → | 131A | 0.215  |
|    |       |       |        | 129B | → | 132B | -0.164 |
|    |       |       |        | 129A | → | 131A | -0.149 |
|    |       |       |        | 127A | → | 132A | 0.137  |
|    |       |       |        | 130A | → | 137A | -0.137 |
|    |       |       |        |      |   |      |        |
|    |       |       |        |      |   |      |        |

|    |       |       |        |      |   |      |        |
|----|-------|-------|--------|------|---|------|--------|
| 32 | 3.809 | 325.5 | 0.0001 | 128B | → | 133B | -0.131 |
|    |       |       |        | 128B | → | 130B | 0.129  |
|    |       |       |        | 123A | → | 131A | 0.127  |
|    |       |       |        | 114B | → | 130B | 0.126  |
|    |       |       |        | 127A | → | 131A | -0.123 |
|    |       |       |        | 120B | → | 135B | 0.123  |
|    |       |       |        | 125A | → | 131A | -0.119 |
|    |       |       |        | 125B | → | 135B | 0.109  |
|    |       |       |        | 125B | → | 132B | 0.104  |
|    |       |       |        | 120A | → | 137A | -0.101 |
|    |       |       |        | 130A | → | 137A | 0.933  |
|    |       |       |        | 130A | → | 138A | -0.158 |
|    |       |       |        | 127B | → | 132B | 0.128  |
|    |       |       |        | 129B | → | 135B | -0.109 |
| 33 | 3.831 | 323.7 | 0.0071 | 130A | → | 138A | 0.552  |
|    |       |       |        | 129B | → | 134B | -0.307 |
|    |       |       |        | 125A | → | 131A | -0.261 |
|    |       |       |        | 127A | → | 131A | -0.253 |
|    |       |       |        | 126A | → | 131A | -0.245 |
|    |       |       |        | 125B | → | 130B | -0.197 |
|    |       |       |        | 128B | → | 134B | -0.135 |
|    |       |       |        | 129B | → | 135B | -0.131 |
|    |       |       |        | 125A | → | 137A | 0.109  |
|    |       |       |        | 122B | → | 134B | -0.106 |
|    |       |       |        | 120A | → | 136A | -0.102 |
|    |       |       |        | 130A | → | 138A | 0.704  |
|    |       |       |        | 130A | → | 137A | 0.269  |
|    |       |       |        | 130A | → | 136A | 0.220  |
| 34 | 3.836 | 323.2 | 0.0016 | 127A | → | 131A | 0.217  |
|    |       |       |        | 129B | → | 134B | 0.205  |
|    |       |       |        | 125A | → | 131A | 0.165  |
|    |       |       |        | 126A | → | 131A | 0.153  |
|    |       |       |        | 129B | → | 135B | 0.125  |
|    |       |       |        | 128A | → | 131A | -0.122 |
|    |       |       |        | 127B | → | 132B | 0.840  |
|    |       |       |        | 127B | → | 133B | -0.281 |
|    |       |       |        | 129A | → | 132A | 0.123  |
|    |       |       |        | 130A | → | 137A | -0.115 |
|    |       |       |        | 127B | → | 134B | 0.114  |
|    |       |       |        | 130A | → | 139A | 0.111  |
|    |       |       |        | 125B | → | 130B | 0.101  |
|    |       |       |        | 125B | → | 130B | 0.449  |
| 35 | 3.873 | 320.1 | 0.0035 | 127A | → | 131A | 0.418  |
|    |       |       |        | 128A | → | 131A | 0.407  |
|    |       |       |        | 130A | → | 139A | -0.371 |
|    |       |       |        | 129A | → | 131A | 0.219  |
|    |       |       |        | 129B | → | 134B | -0.206 |
|    |       |       |        | 125A | → | 131A | 0.206  |
|    |       |       |        | 125A | → | 131A | 0.206  |

|    |       |       |        |      |   |      |        |
|----|-------|-------|--------|------|---|------|--------|
| 37 | 3.892 | 318.5 | 0.0154 | 129B | → | 135B | -0.168 |
|    |       |       |        | 126B | → | 130B | -0.101 |
|    |       |       |        | 130A | → | 139A | 0.827  |
|    |       |       |        | 130A | → | 140A | -0.211 |
|    |       |       |        | 127B | → | 132B | -0.186 |
|    |       |       |        | 125B | → | 130B | 0.180  |
|    |       |       |        | 128A | → | 131A | 0.176  |
|    |       |       |        | 129B | → | 135B | -0.153 |
|    |       |       |        | 127A | → | 131A | 0.139  |
|    |       |       |        | 129A | → | 131A | 0.125  |
| 38 | 3.905 | 317.5 | 0.0233 | 126A | → | 131A | -0.103 |
|    |       |       |        | 126A | → | 131A | 0.404  |
|    |       |       |        | 129B | → | 134B | -0.367 |
|    |       |       |        | 127A | → | 132A | 0.357  |
|    |       |       |        | 125B | → | 132B | 0.229  |
|    |       |       |        | 129B | → | 135B | 0.222  |
|    |       |       |        | 127B | → | 131B | 0.195  |
|    |       |       |        | 128A | → | 133A | -0.175 |
|    |       |       |        | 120A | → | 131A | -0.154 |
|    |       |       |        | 128A | → | 132A | -0.146 |
|    |       |       |        | 130A | → | 139A | 0.139  |
|    |       |       |        | 129A | → | 131A | -0.132 |
|    |       |       |        | 128B | → | 135B | -0.114 |
|    |       |       |        | 125A | → | 136A | -0.111 |
|    |       |       |        | 125A | → | 133A | 0.108  |
|    |       |       |        | 120B | → | 130B | 0.103  |
|    |       |       |        | 126B | → | 131B | 0.687  |
|    |       |       |        | 129A | → | 132A | 0.420  |
|    |       |       |        | 127B | → | 133B | -0.244 |
| 39 | 3.946 | 314.2 | 0.159  | 125A | → | 132A | 0.176  |
|    |       |       |        | 130A | → | 138A | -0.135 |
|    |       |       |        | 124A | → | 134A | -0.113 |
|    |       |       |        | 126B | → | 141B | 0.110  |
|    |       |       |        | 127B | → | 132B | -0.105 |
|    |       |       |        | 115B | → | 131B | 0.104  |
|    |       |       |        | 121A | → | 138A | 0.103  |
|    |       |       |        | 129A | → | 132A | 0.503  |
|    |       |       |        | 127B | → | 132B | -0.235 |
|    |       |       |        | 124B | → | 133B | 0.205  |
| 40 | 3.955 | 313.5 | 0.0576 | 129A | → | 142A | 0.200  |
|    |       |       |        | 129B | → | 137B | 0.188  |
|    |       |       |        | 121B | → | 136B | 0.181  |
|    |       |       |        | 126B | → | 141B | -0.173 |
|    |       |       |        | 121A | → | 138A | -0.152 |
|    |       |       |        | 129B | → | 136B | 0.145  |
|    |       |       |        | 124A | → | 134A | 0.145  |
|    |       |       |        | 126B | → | 131B | 0.131  |
|    |       |       |        | 115B | → | 131B | -0.125 |
|    |       |       |        |      |   |      |        |

|    |       |       |        |      |   |      |        |
|----|-------|-------|--------|------|---|------|--------|
| 41 | 3.999 | 310.0 | 0.0145 | 119A | → | 132A | 0.125  |
|    |       |       |        | 122B | → | 137B | -0.122 |
|    |       |       |        | 124B | → | 131B | 0.122  |
|    |       |       |        | 122A | → | 139A | 0.120  |
|    |       |       |        | 124A | → | 138A | -0.112 |
|    |       |       |        | 124A | → | 132A | 0.108  |
|    |       |       |        | 122A | → | 132A | 0.105  |
|    |       |       |        | 121A | → | 134A | -0.104 |
|    |       |       |        | 127A | → | 134A | -0.102 |
|    |       |       |        | 126A | → | 131A | -0.102 |
|    |       |       |        | 125A | → | 132A | -0.100 |
|    |       |       |        | 127A | → | 132A | 0.498  |
|    |       |       |        | 127B | → | 131B | 0.357  |
|    |       |       |        | 129A | → | 131A | 0.288  |
|    |       |       |        | 126A | → | 131A | -0.198 |
|    |       |       |        | 129B | → | 136B | 0.194  |
|    |       |       |        | 125B | → | 132B | -0.145 |
|    |       |       |        | 128A | → | 132A | -0.133 |
|    |       |       |        | 126B | → | 130B | 0.116  |
|    |       |       |        | 124A | → | 132A | 0.116  |
|    |       |       |        | 127B | → | 133B | 0.114  |
|    |       |       |        | 126B | → | 133B | 0.103  |
|    |       |       |        | 128B | → | 135B | 0.100  |
| 42 | 4.044 | 306.6 | 0.0268 | 129A | → | 131A | 0.628  |
|    |       |       |        | 126A | → | 131A | 0.246  |
|    |       |       |        | 127A | → | 132A | -0.241 |
|    |       |       |        | 125B | → | 130B | -0.211 |
|    |       |       |        | 125A | → | 131A | 0.194  |
|    |       |       |        | 128A | → | 131A | -0.168 |
|    |       |       |        | 127B | → | 133B | -0.166 |
|    |       |       |        | 125B | → | 132B | 0.152  |
|    |       |       |        | 124B | → | 131B | 0.143  |
|    |       |       |        | 128B | → | 134B | -0.127 |
|    |       |       |        | 126B | → | 133B | -0.109 |
|    |       |       |        | 127B | → | 131B | -0.106 |
|    |       |       |        | 128A | → | 132A | 0.102  |
|    |       |       |        | 126B | → | 130B | -0.100 |
| 43 | 4.050 | 306.1 | 0.0109 | 129A | → | 131A | 0.374  |
|    |       |       |        | 124B | → | 131B | -0.241 |
|    |       |       |        | 129B | → | 136B | -0.213 |
|    |       |       |        | 124A | → | 132A | -0.211 |
|    |       |       |        | 126B | → | 130B | 0.210  |
|    |       |       |        | 126B | → | 133B | 0.196  |
|    |       |       |        | 129A | → | 134A | -0.190 |
|    |       |       |        | 115B | → | 133B | 0.182  |
|    |       |       |        | 127A | → | 132A | 0.176  |
|    |       |       |        | 125A | → | 131A | 0.175  |
|    |       |       |        | 121A | → | 132A | 0.134  |



|    |       |       |        |      |   |      |        |
|----|-------|-------|--------|------|---|------|--------|
|    |       |       |        | 122A | → | 138A | -0.133 |
|    |       |       |        | 122B | → | 136B | 0.126  |
|    |       |       |        | 125B | → | 130B | -0.121 |
|    |       |       |        | 126B | → | 144B | 0.120  |
|    |       |       |        | 121B | → | 131B | -0.119 |
|    |       |       |        | 119A | → | 134A | -0.118 |
|    |       |       |        | 129A | → | 145A | 0.117  |
|    |       |       |        | 121A | → | 139A | 0.115  |
|    |       |       |        | 129B | → | 135B | 0.111  |
|    |       |       |        | 118A | → | 134A | 0.110  |
|    |       |       |        | 130A | → | 139A | -0.108 |
| 44 | 4.080 | 303.9 | 0.0363 | 127B | → | 133B | 0.789  |
|    |       |       |        | 127B | → | 132B | 0.257  |
|    |       |       |        | 129A | → | 132A | 0.218  |
|    |       |       |        | 126B | → | 130B | -0.195 |
|    |       |       |        | 125A | → | 132A | 0.176  |
|    |       |       |        | 128A | → | 132A | 0.161  |
|    |       |       |        | 127A | → | 134A | -0.144 |
|    |       |       |        | 126B | → | 133B | -0.118 |
|    |       |       |        | 126A | → | 132A | -0.108 |
| 45 | 4.094 | 302.8 | 0.0084 | 126B | → | 130B | 0.575  |
|    |       |       |        | 123A | → | 131A | -0.324 |
|    |       |       |        | 123B | → | 130B | 0.311  |
|    |       |       |        | 129B | → | 135B | -0.218 |
|    |       |       |        | 128A | → | 136A | -0.197 |
|    |       |       |        | 127B | → | 133B | 0.196  |
|    |       |       |        | 128B | → | 135B | 0.194  |
|    |       |       |        | 125B | → | 134B | -0.172 |
|    |       |       |        | 126A | → | 131A | 0.155  |
|    |       |       |        | 129A | → | 131A | 0.112  |
|    |       |       |        | 113B | → | 132B | 0.110  |
|    |       |       |        | 126B | → | 133B | -0.102 |
| 46 | 4.113 | 301.5 | 0.0023 | 126B | → | 130B | 0.688  |
|    |       |       |        | 123A | → | 131A | 0.254  |
|    |       |       |        | 123B | → | 130B | -0.233 |
|    |       |       |        | 129A | → | 131A | -0.215 |
|    |       |       |        | 125B | → | 134B | 0.163  |
|    |       |       |        | 128B | → | 135B | -0.160 |
|    |       |       |        | 128A | → | 136A | 0.149  |
|    |       |       |        | 129B | → | 135B | 0.141  |
|    |       |       |        | 128B | → | 134B | -0.138 |
|    |       |       |        | 129B | → | 134B | 0.135  |
|    |       |       |        | 125A | → | 131A | 0.110  |
|    |       |       |        | 126B | → | 133B | -0.103 |
| 47 | 4.120 | 300.9 | 0.001  | 129B | → | 135B | 0.487  |
|    |       |       |        | 128B | → | 135B | 0.338  |
|    |       |       |        | 125B | → | 135B | 0.270  |
|    |       |       |        | 129A | → | 131A | -0.257 |

|    |       |       |        |      |   |      |        |
|----|-------|-------|--------|------|---|------|--------|
|    |       |       |        | 125A | → | 131A | 0.245  |
|    |       |       |        | 129B | → | 134B | 0.221  |
|    |       |       |        | 128A | → | 137A | -0.191 |
|    |       |       |        | 128A | → | 136A | -0.175 |
|    |       |       |        | 123B | → | 135B | -0.166 |
|    |       |       |        | 126A | → | 133A | -0.162 |
|    |       |       |        | 128B | → | 134B | -0.141 |
|    |       |       |        | 126B | → | 130B | -0.135 |
|    |       |       |        | 123A | → | 136A | 0.134  |
|    |       |       |        | 128A | → | 131A | 0.123  |
|    |       |       |        | 123B | → | 132B | -0.122 |
|    |       |       |        | 125B | → | 130B | -0.121 |
|    |       |       |        | 123A | → | 131A | -0.116 |
|    |       |       |        | 123A | → | 133A | 0.115  |
|    |       |       |        | 123B | → | 130B | 0.112  |
| 48 | 4.174 | 297.0 | 0.0029 | 126A | → | 132A | 0.836  |
|    |       |       |        | 128A | → | 132A | 0.333  |
|    |       |       |        | 125A | → | 132A | 0.156  |
|    |       |       |        | 123A | → | 132A | 0.150  |
|    |       |       |        | 126A | → | 135A | -0.143 |
|    |       |       |        | 129B | → | 134B | -0.135 |
|    |       |       |        | 130A | → | 138A | 0.129  |
| 49 | 4.180 | 296.6 | 0.0241 | 129B | → | 134B | 0.553  |
|    |       |       |        | 125A | → | 131A | -0.269 |
|    |       |       |        | 123A | → | 131A | -0.231 |
|    |       |       |        | 128B | → | 134B | -0.223 |
|    |       |       |        | 126A | → | 132A | 0.218  |
|    |       |       |        | 125B | → | 134B | 0.172  |
|    |       |       |        | 128A | → | 133A | -0.162 |
|    |       |       |        | 123B | → | 130B | 0.162  |
|    |       |       |        | 123A | → | 137A | -0.136 |
|    |       |       |        | 128A | → | 136A | 0.130  |
|    |       |       |        | 123B | → | 134B | 0.117  |
|    |       |       |        | 127A | → | 132A | 0.114  |
|    |       |       |        | 129A | → | 131A | 0.111  |
|    |       |       |        | 123B | → | 135B | 0.107  |
|    |       |       |        | 125B | → | 130B | 0.101  |
| 50 | 4.199 | 295.3 | 0.1175 | 125A | → | 131A | 0.627  |
|    |       |       |        | 129B | → | 135B | -0.463 |
|    |       |       |        | 129A | → | 131A | -0.299 |
|    |       |       |        | 125B | → | 130B | -0.191 |
|    |       |       |        | 126A | → | 133A | 0.170  |
|    |       |       |        | 128A | → | 131A | -0.149 |
|    |       |       |        | 128B | → | 134B | -0.146 |
|    |       |       |        | 128A | → | 132A | 0.110  |
|    |       |       |        | 125B | → | 134B | 0.106  |
| 51 | 4.216 | 294.1 | 0.0464 | 128A | → | 132A | 0.637  |
|    |       |       |        | 125A | → | 132A | 0.426  |

|    |       |       |        |      |   |      |        |
|----|-------|-------|--------|------|---|------|--------|
| 52 | 4.229 | 293.2 | 0.0041 | 126A | → | 132A | -0.329 |
|    |       |       |        | 127B | → | 133B | -0.204 |
|    |       |       |        | 127A | → | 132A | 0.165  |
|    |       |       |        | 126B | → | 131B | -0.159 |
|    |       |       |        | 125A | → | 135A | -0.130 |
|    |       |       |        | 125A | → | 131A | -0.125 |
|    |       |       |        | 124A | → | 134A | 0.119  |
|    |       |       |        | 124A | → | 132A | 0.102  |
|    |       |       |        | 124B | → | 133B | 0.102  |
|    |       |       |        | 124A | → | 132A | 0.371  |
|    |       |       |        | 124B | → | 131B | 0.342  |
|    |       |       |        | 129A | → | 138A | -0.302 |
|    |       |       |        | 126B | → | 136B | 0.299  |
|    |       |       |        | 129B | → | 136B | -0.268 |
|    |       |       |        | 124B | → | 137B | 0.174  |
|    |       |       |        | 124A | → | 139A | 0.162  |
|    |       |       |        | 121A | → | 132A | 0.156  |
|    |       |       |        | 129A | → | 133A | 0.148  |
|    |       |       |        | 127A | → | 139A | -0.147 |
|    |       |       |        | 127B | → | 137B | 0.143  |
|    |       |       |        | 121B | → | 131B | -0.133 |
|    |       |       |        | 122A | → | 138A | -0.121 |
|    |       |       |        | 122B | → | 136B | 0.118  |
|    |       |       |        | 126B | → | 132B | -0.116 |
|    |       |       |        | 121A | → | 139A | 0.101  |
|    |       |       |        | 127B | → | 131B | 0.101  |
| 53 | 4.270 | 290.4 | 0.0049 | 128B | → | 134B | 0.388  |
|    |       |       |        | 128B | → | 135B | -0.312 |
|    |       |       |        | 123A | → | 133A | 0.300  |
|    |       |       |        | 123B | → | 132B | -0.276 |
|    |       |       |        | 126A | → | 133A | -0.249 |
|    |       |       |        | 128A | → | 141A | 0.212  |
|    |       |       |        | 128A | → | 137A | 0.202  |
|    |       |       |        | 125B | → | 140B | -0.169 |
|    |       |       |        | 129B | → | 134B | 0.169  |
|    |       |       |        | 113B | → | 130B | -0.160 |
|    |       |       |        | 129B | → | 140B | -0.149 |
|    |       |       |        | 115A | → | 131A | 0.144  |
|    |       |       |        | 125B | → | 135B | -0.141 |
|    |       |       |        | 125B | → | 130B | -0.132 |
|    |       |       |        | 116A | → | 131A | -0.123 |
|    |       |       |        | 128A | → | 133A | -0.122 |
|    |       |       |        | 123A | → | 131A | -0.116 |
|    |       |       |        | 113B | → | 132B | 0.115  |
| 54 | 4.315 | 287.4 | 0.0191 | 127A | → | 133A | 0.577  |
|    |       |       |        | 129B | → | 136B | -0.337 |
|    |       |       |        | 129A | → | 133A | -0.266 |
|    |       |       |        | 128A | → | 133A | -0.206 |

|    |       |       |        |      |   |      |        |
|----|-------|-------|--------|------|---|------|--------|
|    |       |       |        | 127A | → | 134A | -0.199 |
|    |       |       |        | 129B | → | 134B | -0.151 |
|    |       |       |        | 129A | → | 138A | 0.144  |
|    |       |       |        | 126B | → | 136B | -0.138 |
|    |       |       |        | 125B | → | 132B | -0.121 |
|    |       |       |        | 125A | → | 133A | -0.119 |
|    |       |       |        | 124B | → | 137B | -0.116 |
|    |       |       |        | 129A | → | 139A | -0.109 |
|    |       |       |        | 124B | → | 133B | 0.108  |
|    |       |       |        | 129B | → | 135B | 0.106  |
|    |       |       |        | 129B | → | 137B | -0.106 |
| 55 | 4.337 | 285.9 | 0.0077 | 124A | → | 134A | 0.101  |
|    |       |       |        | 129B | → | 137B | 0.419  |
|    |       |       |        | 128A | → | 132A | 0.379  |
|    |       |       |        | 127A | → | 133A | 0.338  |
|    |       |       |        | 125A | → | 132A | -0.265 |
|    |       |       |        | 125B | → | 131B | -0.214 |
|    |       |       |        | 128A | → | 133A | -0.175 |
|    |       |       |        | 127A | → | 134A | 0.171  |
|    |       |       |        | 124A | → | 134A | -0.148 |
|    |       |       |        | 124B | → | 133B | -0.145 |
|    |       |       |        | 122A | → | 132A | 0.134  |
|    |       |       |        | 128A | → | 135A | 0.125  |
|    |       |       |        | 129A | → | 142A | -0.121 |
|    |       |       |        | 127A | → | 132A | 0.117  |
|    |       |       |        | 129A | → | 133A | 0.116  |
|    |       |       |        | 129B | → | 134B | -0.110 |
|    |       |       |        | 129B | → | 138B | -0.103 |
| 56 | 4.342 | 285.5 | 0.0071 | 122B | → | 131B | -0.102 |
|    |       |       |        | 129B | → | 136B | 0.480  |
|    |       |       |        | 127A | → | 133A | 0.365  |
|    |       |       |        | 129A | → | 133A | 0.306  |
|    |       |       |        | 129B | → | 137B | -0.288 |
|    |       |       |        | 127A | → | 134A | -0.219 |
|    |       |       |        | 129A | → | 138A | -0.163 |
|    |       |       |        | 126B | → | 136B | 0.153  |
|    |       |       |        | 126A | → | 133A | -0.150 |
|    |       |       |        | 125B | → | 131B | 0.128  |
|    |       |       |        | 124B | → | 137B | 0.128  |
|    |       |       |        | 125A | → | 133A | 0.125  |
|    |       |       |        | 128B | → | 134B | -0.121 |
|    |       |       |        | 124A | → | 139A | 0.116  |
| 57 | 4.369 | 283.8 | 0.002  | 129B | → | 138B | 0.113  |
|    |       |       |        | 125B | → | 131B | 0.748  |
|    |       |       |        | 129B | → | 137B | 0.370  |
|    |       |       |        | 126B | → | 137B | 0.218  |
|    |       |       |        | 129A | → | 139A | -0.210 |
|    |       |       |        | 124B | → | 136B | 0.166  |

|    |       |       |        |      |   |      |        |
|----|-------|-------|--------|------|---|------|--------|
| 58 | 4.378 | 283.2 | 0.03   | 124A | → | 138A | 0.141  |
|    |       |       |        | 128B | → | 134B | 0.119  |
|    |       |       |        | 128B | → | 134B | 0.421  |
|    |       |       |        | 125B | → | 131B | -0.355 |
|    |       |       |        | 126A | → | 133A | 0.338  |
|    |       |       |        | 128B | → | 135B | 0.305  |
|    |       |       |        | 127A | → | 133A | 0.237  |
|    |       |       |        | 125A | → | 133A | 0.186  |
|    |       |       |        | 125B | → | 132B | 0.176  |
|    |       |       |        | 128A | → | 133A | 0.163  |
|    |       |       |        | 123B | → | 130B | -0.162 |
|    |       |       |        | 129A | → | 139A | -0.133 |
|    |       |       |        | 126B | → | 137B | 0.115  |
|    |       |       |        | 129B | → | 134B | 0.114  |
|    |       |       |        | 128A | → | 132A | 0.109  |
| 59 | 4.380 | 283.1 | 0.0542 | 125A | → | 132A | -0.109 |
|    |       |       |        | 126A | → | 133A | 0.566  |
|    |       |       |        | 129A | → | 133A | -0.280 |
|    |       |       |        | 125B | → | 131B | 0.264  |
|    |       |       |        | 129B | → | 136B | 0.235  |
|    |       |       |        | 128B | → | 135B | -0.201 |
|    |       |       |        | 126B | → | 137B | -0.192 |
|    |       |       |        | 129A | → | 139A | 0.190  |
|    |       |       |        | 129B | → | 135B | 0.154  |
|    |       |       |        | 124A | → | 138A | -0.116 |
|    |       |       |        | 124B | → | 136B | -0.113 |
|    |       |       |        | 128B | → | 134B | 0.111  |
|    |       |       |        | 128A | → | 137A | -0.111 |
|    |       |       |        | 129B | → | 137B | -0.108 |
|    |       |       |        | 126B | → | 132B | -0.107 |
| 60 | 4.394 | 282.2 | 0.0077 | 125B | → | 131B | 0.348  |
|    |       |       |        | 128B | → | 135B | 0.299  |
|    |       |       |        | 129A | → | 139A | 0.260  |
|    |       |       |        | 126B | → | 137B | -0.249 |
|    |       |       |        | 126A | → | 133A | -0.238 |
|    |       |       |        | 127A | → | 133A | 0.221  |
|    |       |       |        | 129B | → | 136B | -0.213 |
|    |       |       |        | 124B | → | 136B | -0.182 |
|    |       |       |        | 124A | → | 138A | -0.172 |
|    |       |       |        | 125A | → | 132A | -0.169 |
|    |       |       |        | 128B | → | 134B | 0.159  |
|    |       |       |        | 124A | → | 134A | -0.153 |
|    |       |       |        | 124B | → | 133B | -0.143 |
|    |       |       |        | 127B | → | 136B | -0.129 |
|    |       |       |        | 129A | → | 133A | 0.126  |
|    |       |       |        | 123B | → | 130B | -0.123 |
|    |       |       |        | 115B | → | 131B | 0.123  |
|    |       |       |        | 124A | → | 133A | 0.112  |

|    |       |       |        |      |   |      |        |
|----|-------|-------|--------|------|---|------|--------|
| 61 | 4.420 | 280.5 | 0.0262 | 127A | → | 138A | 0.111  |
|    |       |       |        | 129B | → | 137B | -0.103 |
|    |       |       |        | 125A | → | 132A | 0.518  |
|    |       |       |        | 129B | → | 137B | 0.417  |
|    |       |       |        | 127A | → | 133A | 0.295  |
|    |       |       |        | 128A | → | 132A | -0.280 |
|    |       |       |        | 128A | → | 135A | -0.234 |
|    |       |       |        | 128B | → | 135B | 0.196  |
|    |       |       |        | 127A | → | 134A | 0.164  |
|    |       |       |        | 128B | → | 134B | -0.152 |
|    |       |       |        | 126A | → | 133A | 0.137  |
|    |       |       |        | 127A | → | 132A | -0.128 |
|    |       |       |        | 125B | → | 135B | -0.112 |
|    |       |       |        | 129B | → | 136B | 0.110  |
|    |       |       |        | 129B | → | 138B | -0.104 |
|    |       |       |        | 129A | → | 135A | -0.102 |
|    |       |       |        | 125B | → | 131B | -0.101 |
| 62 | 4.429 | 279.9 | 0.0162 | 128B | → | 134B | 0.481  |
|    |       |       |        | 128B | → | 135B | -0.288 |
|    |       |       |        | 128A | → | 137A | -0.274 |
|    |       |       |        | 125B | → | 135B | 0.245  |
|    |       |       |        | 125A | → | 132A | 0.244  |
|    |       |       |        | 123B | → | 134B | 0.210  |
|    |       |       |        | 125B | → | 134B | 0.194  |
|    |       |       |        | 129A | → | 133A | 0.177  |
|    |       |       |        | 128A | → | 132A | -0.172 |
|    |       |       |        | 126A | → | 133A | -0.172 |
|    |       |       |        | 123A | → | 136A | 0.166  |
|    |       |       |        | 123A | → | 133A | -0.151 |
|    |       |       |        | 123B | → | 132B | 0.145  |
|    |       |       |        | 129B | → | 140B | 0.131  |
|    |       |       |        | 129B | → | 137B | 0.125  |
|    |       |       |        | 113B | → | 130B | 0.122  |
|    |       |       |        | 126A | → | 136A | -0.114 |
|    |       |       |        | 128B | → | 132B | -0.105 |
| 63 | 4.433 | 279.7 | 0.0072 | 129B | → | 134B | -0.101 |
|    |       |       |        | 126B | → | 132B | 0.276  |
|    |       |       |        | 125A | → | 133A | 0.266  |
|    |       |       |        | 120A | → | 131A | -0.255 |
|    |       |       |        | 128B | → | 135B | -0.240 |
|    |       |       |        | 126A | → | 131A | -0.228 |
|    |       |       |        | 120B | → | 130B | 0.206  |
|    |       |       |        | 128A | → | 136A | -0.173 |
|    |       |       |        | 129B | → | 134B | 0.169  |
|    |       |       |        | 121A | → | 132A | 0.162  |
|    |       |       |        | 125B | → | 134B | -0.150 |
|    |       |       |        | 122A | → | 133A | 0.143  |
|    |       |       |        | 127A | → | 133A | 0.141  |

|    |       |       |        |      |   |      |        |
|----|-------|-------|--------|------|---|------|--------|
|    |       |       |        | 119B | → | 130B | -0.137 |
|    |       |       |        | 121B | → | 131B | -0.136 |
|    |       |       |        | 123B | → | 135B | -0.134 |
|    |       |       |        | 125A | → | 134A | 0.131  |
|    |       |       |        | 122B | → | 132B | -0.131 |
|    |       |       |        | 125B | → | 135B | 0.122  |
|    |       |       |        | 123A | → | 137A | 0.121  |
|    |       |       |        | 128B | → | 140B | -0.115 |
|    |       |       |        | 125B | → | 133B | 0.106  |
|    |       |       |        | 114A | → | 131A | -0.105 |
|    |       |       |        | 121B | → | 130B | 0.103  |
| 64 | 4.460 | 278.0 | 0.0004 | 130A | → | 140A | 0.932  |
|    |       |       |        | 130A | → | 139A | 0.248  |
|    |       |       |        | 129B | → | 136B | 0.103  |
| 65 | 4.480 | 276.8 | 0.0596 | 127A | → | 134A | 0.428  |
|    |       |       |        | 129A | → | 133A | 0.371  |
|    |       |       |        | 129B | → | 136B | -0.368 |
|    |       |       |        | 128A | → | 134A | -0.240 |
|    |       |       |        | 126A | → | 133A | 0.236  |
|    |       |       |        | 129B | → | 137B | -0.222 |
|    |       |       |        | 121B | → | 131B | 0.203  |
|    |       |       |        | 121A | → | 132A | -0.199 |
|    |       |       |        | 127A | → | 132A | 0.175  |
|    |       |       |        | 130A | → | 140A | 0.173  |
|    |       |       |        | 122B | → | 133B | -0.132 |
|    |       |       |        | 126B | → | 132B | 0.127  |
|    |       |       |        | 122A | → | 134A | 0.113  |
|    |       |       |        | 126B | → | 133B | -0.102 |
| 66 | 4.484 | 276.5 | 0.0241 | 129A | → | 133A | 0.592  |
|    |       |       |        | 127A | → | 134A | -0.426 |
|    |       |       |        | 126A | → | 133A | 0.310  |
|    |       |       |        | 129A | → | 135A | -0.229 |
|    |       |       |        | 128A | → | 134A | 0.183  |
|    |       |       |        | 127A | → | 133A | -0.138 |
|    |       |       |        | 120A | → | 131A | 0.132  |
|    |       |       |        | 128B | → | 134B | -0.129 |
|    |       |       |        | 126B | → | 132B | 0.128  |
|    |       |       |        | 128B | → | 135B | -0.124 |
|    |       |       |        | 120B | → | 130B | -0.106 |
| 67 | 4.502 | 275.4 | 0.0492 | 127A | → | 134A | 0.418  |
|    |       |       |        | 126B | → | 132B | 0.355  |
|    |       |       |        | 129B | → | 136B | 0.307  |
|    |       |       |        | 129B | → | 137B | -0.248 |
|    |       |       |        | 121A | → | 132A | 0.209  |
|    |       |       |        | 121B | → | 131B | -0.203 |
|    |       |       |        | 120A | → | 131A | 0.171  |
|    |       |       |        | 127A | → | 132A | -0.152 |
|    |       |       |        | 126A | → | 131A | 0.145  |

|    |       |       |        |      |   |      |        |
|----|-------|-------|--------|------|---|------|--------|
| 68 | 4.517 | 274.5 | 0.0179 | 120B | → | 130B | -0.126 |
|    |       |       |        | 128A | → | 134A | -0.123 |
|    |       |       |        | 125A | → | 132A | -0.118 |
|    |       |       |        | 122B | → | 133B | 0.116  |
|    |       |       |        | 122A | → | 134A | -0.116 |
|    |       |       |        | 129A | → | 134A | -0.114 |
|    |       |       |        | 130A | → | 140A | -0.110 |
|    |       |       |        | 126B | → | 132B | 0.727  |
|    |       |       |        | 130A | → | 142A | 0.344  |
|    |       |       |        | 126A | → | 134A | 0.181  |
|    |       |       |        | 129B | → | 137B | 0.162  |
|    |       |       |        | 128B | → | 136B | -0.141 |
|    |       |       |        | 129A | → | 133A | -0.120 |
|    |       |       |        | 129A | → | 138A | -0.115 |
|    |       |       |        | 127A | → | 134A | -0.108 |
|    |       |       |        | 127A | → | 132A | 0.108  |
|    |       |       |        | 118A | → | 132A | -0.105 |
|    |       |       |        | 126B | → | 136B | 0.103  |
|    |       |       |        | 116B | → | 131B | 0.102  |
| 69 | 4.534 | 273.5 | 0.0069 | 130A | → | 142A | 0.658  |
|    |       |       |        | 126A | → | 134A | 0.330  |
|    |       |       |        | 129A | → | 134A | -0.262 |
|    |       |       |        | 126B | → | 132B | -0.248 |
|    |       |       |        | 128B | → | 136B | -0.192 |
|    |       |       |        | 130A | → | 141A | -0.156 |
|    |       |       |        | 126B | → | 133B | -0.155 |
|    |       |       |        | 116B | → | 131B | -0.144 |
|    |       |       |        | 124B | → | 131B | -0.130 |
|    |       |       |        | 118A | → | 132A | 0.124  |
| 70 | 4.554 | 272.2 | 0.0062 | 118B | → | 131B | -0.109 |
|    |       |       |        | 119A | → | 132A | 0.104  |
|    |       |       |        | 128A | → | 135A | 0.394  |
|    |       |       |        | 129A | → | 135A | -0.292 |
|    |       |       |        | 126B | → | 132B | -0.217 |
|    |       |       |        | 128A | → | 133A | -0.206 |
|    |       |       |        | 127A | → | 134A | 0.189  |
|    |       |       |        | 129A | → | 134A | 0.189  |
|    |       |       |        | 122B | → | 131B | 0.177  |
|    |       |       |        | 116B | → | 131B | 0.166  |
|    |       |       |        | 128B | → | 135B | 0.161  |
|    |       |       |        | 122A | → | 132A | -0.158 |
|    |       |       |        | 121B | → | 133B | -0.151 |
|    |       |       |        | 125B | → | 132B | -0.146 |
|    |       |       |        | 118A | → | 132A | -0.139 |
|    |       |       |        | 124B | → | 131B | 0.139  |
|    |       |       |        | 130A | → | 142A | 0.136  |
|    |       |       |        | 121A | → | 134A | 0.134  |
|    |       |       |        | 129A | → | 138A | 0.127  |



|    |       |       |        |      |   |      |        |
|----|-------|-------|--------|------|---|------|--------|
| 71 | 4.564 | 271.7 | 0.0361 | 121B | → | 131B | -0.125 |
|    |       |       |        | 129A | → | 133A | 0.120  |
|    |       |       |        | 124A | → | 134A | 0.119  |
|    |       |       |        | 125A | → | 134A | 0.115  |
|    |       |       |        | 124B | → | 133B | 0.114  |
|    |       |       |        | 126B | → | 136B | -0.103 |
|    |       |       |        | 129A | → | 135A | 0.659  |
|    |       |       |        | 129A | → | 133A | 0.218  |
|    |       |       |        | 129A | → | 134A | 0.199  |
|    |       |       |        | 128B | → | 135B | -0.175 |
|    |       |       |        | 128A | → | 133A | 0.172  |
|    |       |       |        | 128A | → | 135A | -0.171 |
|    |       |       |        | 130A | → | 142A | 0.152  |
|    |       |       |        | 126B | → | 132B | -0.124 |
|    |       |       |        | 122B | → | 131B | 0.122  |
|    |       |       |        | 122A | → | 132A | -0.121 |
|    |       |       |        | 125A | → | 132A | -0.118 |
|    |       |       |        | 129B | → | 137B | 0.116  |
|    |       |       |        | 116B | → | 131B | 0.114  |
|    |       |       |        | 125B | → | 132B | 0.110  |
| 72 | 4.583 | 270.5 | 0.0164 | 128B | → | 136B | 0.522  |
|    |       |       |        | 129A | → | 135A | -0.328 |
|    |       |       |        | 128A | → | 133A | 0.279  |
|    |       |       |        | 128B | → | 135B | -0.275 |
|    |       |       |        | 125B | → | 132B | 0.179  |
|    |       |       |        | 128A | → | 135A | 0.173  |
|    |       |       |        | 129A | → | 133A | -0.148 |
|    |       |       |        | 129A | → | 134A | -0.147 |
|    |       |       |        | 122B | → | 131B | 0.120  |
|    |       |       |        | 128A | → | 134A | -0.119 |
|    |       |       |        | 122A | → | 132A | -0.118 |
|    |       |       |        | 125A | → | 132A | -0.116 |
|    |       |       |        | 114B | → | 130B | -0.114 |
|    |       |       |        | 126B | → | 133B | -0.113 |
|    |       |       |        | 126A | → | 133A | -0.107 |
|    |       |       |        | 128B | → | 137B | -0.106 |
|    |       |       |        | 119B | → | 130B | 0.102  |
|    |       |       |        | 128B | → | 136B | 0.542  |
|    |       |       |        | 130A | → | 142A | 0.319  |
|    |       |       |        | 129A | → | 134A | 0.223  |
| 73 | 4.587 | 270.3 | 0.0025 | 128A | → | 135A | -0.193 |
|    |       |       |        | 122B | → | 131B | -0.174 |
|    |       |       |        | 130A | → | 141A | -0.167 |
|    |       |       |        | 129B | → | 137B | -0.166 |
|    |       |       |        | 122A | → | 132A | 0.163  |
|    |       |       |        | 125A | → | 132A | 0.153  |
|    |       |       |        | 128A | → | 134A | 0.148  |
|    |       |       |        | 118B | → | 131B | 0.143  |

|    |       |       |        |      |   |      |        |
|----|-------|-------|--------|------|---|------|--------|
| 74 | 4.590 | 270.1 | 0.0442 | 128B | → | 134B | 0.129  |
|    |       |       |        | 121A | → | 134A | -0.122 |
|    |       |       |        | 121B | → | 133B | 0.119  |
|    |       |       |        | 126B | → | 133B | 0.119  |
|    |       |       |        | 128B | → | 137B | -0.118 |
|    |       |       |        | 119A | → | 132A | -0.113 |
|    |       |       |        | 125A | → | 134A | 0.113  |
|    |       |       |        | 124B | → | 131B | 0.106  |
|    |       |       |        | 128A | → | 133A | -0.103 |
|    |       |       |        | 128B | → | 136B | 0.473  |
|    |       |       |        | 129A | → | 135A | 0.354  |
|    |       |       |        | 128A | → | 133A | -0.167 |
|    |       |       |        | 122B | → | 130B | -0.161 |
|    |       |       |        | 122A | → | 131A | 0.159  |
|    |       |       |        | 123B | → | 132B | -0.147 |
|    |       |       |        | 120A | → | 133A | -0.147 |
|    |       |       |        | 125A | → | 131A | -0.144 |
|    |       |       |        | 129A | → | 134A | -0.140 |
|    |       |       |        | 120B | → | 132B | 0.129  |
|    |       |       |        | 119B | → | 130B | -0.115 |
|    |       |       |        | 118B | → | 131B | -0.115 |
|    |       |       |        | 125B | → | 132B | -0.114 |
|    |       |       |        | 129B | → | 137B | 0.114  |
|    |       |       |        | 128A | → | 137A | -0.114 |
|    |       |       |        | 120B | → | 130B | 0.113  |
|    |       |       |        | 128B | → | 134B | 0.112  |
|    |       |       |        | 116A | → | 131A | -0.110 |
|    |       |       |        | 120A | → | 131A | -0.100 |
|    |       |       |        | 128A | → | 135A | 0.100  |
| 75 | 4.597 | 269.7 | 0.0693 | 128A | → | 133A | 0.259  |
|    |       |       |        | 125B | → | 132B | 0.242  |
|    |       |       |        | 129A | → | 135A | -0.226 |
|    |       |       |        | 122B | → | 130B | -0.224 |
|    |       |       |        | 128A | → | 135A | -0.215 |
|    |       |       |        | 120A | → | 133A | -0.204 |
|    |       |       |        | 122A | → | 131A | 0.204  |
|    |       |       |        | 120B | → | 132B | 0.183  |
|    |       |       |        | 125A | → | 131A | -0.175 |
|    |       |       |        | 128B | → | 136B | -0.157 |
|    |       |       |        | 128A | → | 137A | -0.155 |
|    |       |       |        | 116B | → | 130B | 0.150  |
|    |       |       |        | 128B | → | 135B | -0.148 |
|    |       |       |        | 118B | → | 130B | -0.146 |
|    |       |       |        | 123B | → | 132B | -0.138 |
|    |       |       |        | 115A | → | 131A | -0.135 |
|    |       |       |        | 129A | → | 134A | 0.118  |
|    |       |       |        | 116A | → | 131A | -0.118 |
|    |       |       |        | 128B | → | 134B | -0.114 |

|    |       |       |        |      |   |      |        |
|----|-------|-------|--------|------|---|------|--------|
| 76 | 4.620 | 268.4 | 0.0014 | 130A | → | 141A | -0.114 |
|    |       |       |        | 130A | → | 141A | 0.930  |
|    |       |       |        | 130A | → | 142A | 0.215  |
|    |       |       |        | 128A | → | 135A | -0.152 |
| 77 | 4.634 | 267.5 | 0.0206 | 127A | → | 133A | 0.114  |
|    |       |       |        | 128A | → | 135A | 0.619  |
|    |       |       |        | 125A | → | 132A | 0.263  |
|    |       |       |        | 125A | → | 135A | -0.224 |
|    |       |       |        | 125A | → | 133A | 0.176  |
|    |       |       |        | 128A | → | 132A | -0.174 |
|    |       |       |        | 129A | → | 135A | 0.171  |
|    |       |       |        | 114A | → | 131A | 0.148  |
|    |       |       |        | 127A | → | 135A | 0.146  |
|    |       |       |        | 129A | → | 134A | 0.144  |
|    |       |       |        | 126B | → | 133B | 0.143  |
|    |       |       |        | 130A | → | 141A | 0.141  |
|    |       |       |        | 128B | → | 135B | -0.136 |
|    |       |       |        | 122B | → | 131B | -0.126 |
|    |       |       |        | 122A | → | 132A | 0.122  |
|    |       |       |        | 128B | → | 134B | -0.106 |
| 78 | 4.645 | 266.9 | 0.0069 | 114B | → | 130B | -0.106 |
|    |       |       |        | 128B | → | 137B | 0.924  |
|    |       |       |        | 128B | → | 138B | -0.235 |
|    |       |       |        | 128B | → | 136B | 0.195  |
| 79 | 4.661 | 266.0 | 0.0069 | 125B | → | 132B | 0.383  |
|    |       |       |        | 126B | → | 133B | -0.372 |
|    |       |       |        | 129A | → | 134A | -0.298 |
|    |       |       |        | 114A | → | 131A | -0.246 |
|    |       |       |        | 128A | → | 135A | 0.225  |
|    |       |       |        | 128A | → | 133A | 0.217  |
|    |       |       |        | 125A | → | 133A | -0.189 |
|    |       |       |        | 126A | → | 131A | -0.181 |
|    |       |       |        | 114B | → | 130B | 0.160  |
|    |       |       |        | 123B | → | 130B | 0.148  |
|    |       |       |        | 129A | → | 135A | 0.134  |
|    |       |       |        | 118A | → | 132A | -0.129 |
|    |       |       |        | 119A | → | 132A | -0.120 |
|    |       |       |        | 123A | → | 131A | -0.119 |
|    |       |       |        | 125A | → | 132A | 0.115  |
|    |       |       |        | 125A | → | 135A | -0.113 |
| 80 | 4.671 | 265.5 | 0.1971 | 128A | → | 134A | 0.101  |
|    |       |       |        | 124A | → | 132A | 0.100  |
|    |       |       |        | 126B | → | 133B | 0.443  |
|    |       |       |        | 129A | → | 134A | 0.346  |
|    |       |       |        | 125B | → | 132B | 0.328  |
|    |       |       |        | 128A | → | 133A | 0.197  |
|    |       |       |        | 114A | → | 131A | -0.188 |
|    |       |       |        | 118A | → | 132A | 0.187  |

|    |       |       |        |      |   |      |        |
|----|-------|-------|--------|------|---|------|--------|
|    |       |       |        | 127A | → | 132A | -0.168 |
|    |       |       |        | 124B | → | 131B | -0.161 |
|    |       |       |        | 119A | → | 132A | 0.160  |
|    |       |       |        | 123B | → | 130B | 0.158  |
|    |       |       |        | 130A | → | 142A | 0.152  |
|    |       |       |        | 125A | → | 133A | -0.142 |
|    |       |       |        | 126A | → | 131A | -0.132 |
|    |       |       |        | 114B | → | 130B | 0.124  |
|    |       |       |        | 118B | → | 131B | -0.112 |
|    |       |       |        | 128A | → | 135A | 0.111  |
|    |       |       |        | 124A | → | 132A | -0.105 |
| 81 | 4.693 | 264.2 | 0.0052 | 128A | → | 134A | 0.759  |
|    |       |       |        | 127A | → | 134A | 0.288  |
|    |       |       |        | 126A | → | 134A | 0.254  |
|    |       |       |        | 125A | → | 134A | 0.217  |
|    |       |       |        | 130A | → | 142A | -0.200 |
|    |       |       |        | 125A | → | 133A | 0.189  |
| 82 | 4.747 | 261.2 | 0.0172 | 126A | → | 134A | 0.796  |
|    |       |       |        | 130A | → | 142A | -0.338 |
|    |       |       |        | 125A | → | 133A | -0.286 |
|    |       |       |        | 128A | → | 134A | -0.175 |
|    |       |       |        | 126B | → | 133B | 0.111  |
|    |       |       |        | 123A | → | 134A | 0.103  |
| 83 | 4.772 | 259.8 | 0.0068 | 125A | → | 133A | 0.631  |
|    |       |       |        | 123B | → | 130B | 0.292  |
|    |       |       |        | 128A | → | 136A | 0.267  |
|    |       |       |        | 128A | → | 134A | -0.256 |
|    |       |       |        | 126A | → | 134A | 0.245  |
|    |       |       |        | 120B | → | 130B | -0.169 |
|    |       |       |        | 123A | → | 137A | -0.133 |
|    |       |       |        | 120A | → | 137A | -0.115 |
|    |       |       |        | 122B | → | 132B | 0.107  |
|    |       |       |        | 127B | → | 134B | -0.101 |
| 84 | 4.780 | 259.4 | 0.0005 | 129B | → | 138B | 0.932  |
|    |       |       |        | 129B | → | 137B | 0.248  |
|    |       |       |        | 129B | → | 139B | 0.217  |
| 85 | 4.791 | 258.8 | 0.0021 | 127B | → | 134B | 0.754  |
|    |       |       |        | 127B | → | 135B | -0.551 |
|    |       |       |        | 127B | → | 132B | -0.161 |
|    |       |       |        | 127B | → | 136B | -0.133 |
| 86 | 4.797 | 258.5 | 0.0002 | 125B | → | 133B | 0.946  |
|    |       |       |        | 128A | → | 136A | 0.126  |
|    |       |       |        | 125A | → | 134A | -0.106 |
| 87 | 4.825 | 257.0 | 0.0001 | 124A | → | 131A | 0.963  |
|    |       |       |        | 127A | → | 131A | -0.203 |
|    |       |       |        | 125A | → | 131A | -0.102 |
| 88 | 4.838 | 256.3 | 0.0003 | 124B | → | 130B | 0.979  |
| 89 | 4.845 | 255.9 | 0.0001 | 127B | → | 135B | 0.783  |

|    |       |       |        |      |   |      |        |
|----|-------|-------|--------|------|---|------|--------|
| 90 | 4.885 | 253.8 | 0.0058 | 127B | → | 134B | 0.549  |
|    |       |       |        | 129B | → | 140B | 0.154  |
|    |       |       |        | 124B | → | 130B | 0.102  |
|    |       |       |        | 129B | → | 140B | 0.892  |
|    |       |       |        | 125B | → | 135B | -0.153 |
|    |       |       |        | 129B | → | 139B | -0.146 |
|    |       |       |        | 123B | → | 132B | -0.117 |
|    |       |       |        | 127B | → | 135B | -0.108 |
| 91 | 4.900 | 253.0 | 0.0295 | 127B | → | 134B | -0.101 |
|    |       |       |        | 124B | → | 131B | 0.571  |
|    |       |       |        | 124A | → | 132A | -0.568 |
|    |       |       |        | 125A | → | 134A | -0.337 |
|    |       |       |        | 129A | → | 138A | 0.162  |
|    |       |       |        | 128A | → | 134A | 0.149  |
|    |       |       |        | 121B | → | 131B | -0.136 |
|    |       |       |        | 125B | → | 133B | -0.113 |
| 92 | 4.933 | 251.3 | 0.044  | 126B | → | 136B | 0.107  |
|    |       |       |        | 123A | → | 131A | 0.100  |
|    |       |       |        | 123A | → | 131A | 0.618  |
|    |       |       |        | 123B | → | 130B | 0.505  |
|    |       |       |        | 125A | → | 134A | 0.334  |
|    |       |       |        | 125A | → | 133A | -0.252 |
|    |       |       |        | 128A | → | 134A | -0.132 |
|    |       |       |        | 120A | → | 131A | -0.129 |
| 93 | 4.973 | 249.3 | 0.0428 | 114A | → | 131A | 0.126  |
|    |       |       |        | 125A | → | 134A | 0.729  |
|    |       |       |        | 124A | → | 132A | -0.366 |
|    |       |       |        | 124B | → | 131B | 0.245  |
|    |       |       |        | 123A | → | 131A | -0.233 |
|    |       |       |        | 128A | → | 134A | -0.204 |
|    |       |       |        | 123B | → | 130B | -0.201 |
|    |       |       |        | 129A | → | 138A | -0.100 |
| 94 | 5.006 | 247.7 | 0.0004 | 129B | → | 141B | 0.937  |
| 95 | 5.044 | 245.8 | 0.0002 | 126B | → | 137B | 0.123  |
|    |       |       |        | 129B | → | 139B | 0.117  |
|    |       |       |        | 128B | → | 138B | 0.926  |
|    |       |       |        | 128B | → | 137B | 0.263  |
| 96 | 5.071 | 244.5 | 0.0012 | 128B | → | 139B | 0.217  |
|    |       |       |        | 123A | → | 132A | 0.482  |
|    |       |       |        | 120B | → | 131B | -0.473 |
|    |       |       |        | 119B | → | 131B | -0.295 |
|    |       |       |        | 121B | → | 131B | -0.258 |
|    |       |       |        | 117B | → | 133B | 0.174  |
|    |       |       |        | 128B | → | 141B | 0.170  |
|    |       |       |        | 123A | → | 135A | 0.139  |
|    |       |       |        | 120A | → | 132A | 0.131  |
|    |       |       |        | 119B | → | 133B | -0.130 |
|    |       |       |        | 123B | → | 131B | 0.127  |

|      |       |       |        |      |   |      |        |
|------|-------|-------|--------|------|---|------|--------|
| 97   | 5.082 | 244.0 | 0.0032 | 128A | → | 137A | -0.125 |
|      |       |       |        | 123B | → | 132B | -0.121 |
|      |       |       |        | 114B | → | 131B | -0.118 |
|      |       |       |        | 126A | → | 132A | -0.108 |
|      |       |       |        | 117B | → | 131B | -0.100 |
|      |       |       |        | 128A | → | 137A | 0.432  |
|      |       |       |        | 123B | → | 132B | 0.377  |
|      |       |       |        | 125A | → | 137A | 0.257  |
|      |       |       |        | 120A | → | 133A | -0.250 |
|      |       |       |        | 122A | → | 131A | 0.228  |
|      |       |       |        | 114B | → | 132B | 0.167  |
|      |       |       |        | 123B | → | 131B | 0.158  |
|      |       |       |        | 119B | → | 132B | -0.157 |
|      |       |       |        | 120A | → | 136A | -0.157 |
|      |       |       |        | 120B | → | 131B | -0.146 |
|      |       |       |        | 129A | → | 137A | 0.138  |
|      |       |       |        | 127A | → | 137A | -0.129 |
|      |       |       |        | 125B | → | 135B | 0.118  |
|      |       |       |        | 122A | → | 137A | 0.118  |
|      |       |       |        | 123A | → | 133A | 0.106  |
|      |       |       |        | 123A | → | 132A | 0.105  |
| 120B | →     | 132B  | 0.105  |      |   |      |        |
| 98   | 5.092 | 243.5 | 0.0006 | 122A | → | 133A | -0.103 |
|      |       |       |        | 123A | → | 132A | 0.723  |
|      |       |       |        | 120B | → | 131B | 0.296  |
|      |       |       |        | 127B | → | 136B | -0.239 |
|      |       |       |        | 123A | → | 135A | 0.233  |
|      |       |       |        | 123B | → | 131B | -0.225 |
|      |       |       |        | 119B | → | 131B | 0.184  |
|      |       |       |        | 121B | → | 131B | 0.167  |
|      |       |       |        | 126A | → | 135A | -0.135 |
|      |       |       |        | 126A | → | 132A | -0.128 |
| 99   | 5.094 | 243.4 | 0.0074 | 128B | → | 141B | -0.119 |
|      |       |       |        | 117B | → | 133B | -0.118 |
|      |       |       |        | 127B | → | 136B | 0.831  |
|      |       |       |        | 123A | → | 132A | 0.237  |
|      |       |       |        | 124B | → | 133B | -0.154 |
|      |       |       |        | 127B | → | 134B | 0.142  |
|      |       |       |        | 127B | → | 137B | -0.142 |
| 100  | 5.124 | 242.0 | 0.0009 | 129A | → | 139A | 0.139  |
|      |       |       |        | 124B | → | 136B | -0.108 |
|      |       |       |        | 123B | → | 131B | 0.945  |
|      |       |       |        | 120B | → | 131B | 0.167  |
|      |       |       |        | 123A | → | 132A | 0.102  |

**Table S3** Spin-singlet excited states of **Co<sup>III</sup>(Fctpy)<sub>2</sub>** in CH<sub>3</sub>CN calculated by using the TDDFT method. The solvent effect was taken into account by the PCM method.  $\Delta E$ ,  $\lambda$ , and  $f$  are excitation energy, excitation wavelength, and oscillator strength, respectively.

| State | $\Delta E$ (eV) | $\lambda$ (nm) | $f$    | Configuration |           | Coefficient |
|-------|-----------------|----------------|--------|---------------|-----------|-------------|
|       |                 |                |        | Occ. MO       | Unocc. MO |             |
| 1     | 1.751           | 708.0          | 0.0133 | 209           | → 231     | 0.302       |
|       |                 |                |        | 209           | → 215     | -0.285      |
|       |                 |                |        | 213           | → 215     | 0.256       |
|       |                 |                |        | 213           | → 231     | -0.247      |
|       |                 |                |        | 209           | → 225     | -0.210      |
|       |                 |                |        | 212           | → 215     | -0.206      |
|       |                 |                |        | 213           | → 225     | 0.168       |
|       |                 |                |        | 212           | → 231     | 0.140       |
|       |                 |                |        | 212           | → 225     | -0.122      |
|       |                 |                |        | 208           | → 232     | 0.222       |
| 2     | 1.756           | 706.1          | 0.0010 | 210           | → 232     | 0.220       |
|       |                 |                |        | 211           | → 214     | -0.214      |
|       |                 |                |        | 211           | → 216     | 0.210       |
|       |                 |                |        | 210           | → 214     | 0.200       |
|       |                 |                |        | 210           | → 216     | -0.197      |
|       |                 |                |        | 211           | → 232     | -0.184      |
|       |                 |                |        | 210           | → 224     | 0.173       |
|       |                 |                |        | 208           | → 214     | 0.171       |
|       |                 |                |        | 208           | → 216     | -0.169      |
|       |                 |                |        | 211           | → 224     | -0.168      |
| 3     | 1.788           | 693.3          | 0.0054 | 208           | → 224     | 0.167       |
|       |                 |                |        | 208           | → 232     | 0.300       |
|       |                 |                |        | 208           | → 214     | 0.261       |
|       |                 |                |        | 208           | → 216     | -0.258      |
|       |                 |                |        | 208           | → 224     | 0.244       |
|       |                 |                |        | 211           | → 214     | 0.188       |
|       |                 |                |        | 211           | → 216     | -0.183      |
|       |                 |                |        | 211           | → 232     | 0.181       |
|       |                 |                |        | 211           | → 224     | 0.155       |
|       |                 |                |        | 211           | → 229     | 0.138       |
| 4     | 1.794           | 691.1          | 0.0004 | 208           | → 229     | 0.131       |
|       |                 |                |        | 209           | → 215     | 0.313       |
|       |                 |                |        | 213           | → 215     | 0.256       |
|       |                 |                |        | 209           | → 231     | -0.231      |
|       |                 |                |        | 209           | → 225     | 0.211       |
|       |                 |                |        | 212           | → 215     | -0.209      |
|       |                 |                |        | 209           | → 230     | 0.202       |
|       |                 |                |        | 212           | → 230     | -0.177      |
|       |                 |                |        | 213           | → 231     | -0.152      |
|       |                 |                |        | 213           | → 225     | 0.137       |
|       |                 |                |        | 212           | → 225     | -0.129      |
|       |                 |                |        | 212           | → 231     | 0.113       |
|       |                 |                |        | 209           | → 214     | -0.100      |

|    |       |       |        |     |   |     |        |
|----|-------|-------|--------|-----|---|-----|--------|
| 5  | 1.891 | 655.7 | 0.0281 | 212 | → | 215 | 0.365  |
|    |       |       |        | 212 | → | 231 | -0.298 |
|    |       |       |        | 213 | → | 215 | 0.272  |
|    |       |       |        | 213 | → | 230 | 0.222  |
|    |       |       |        | 212 | → | 225 | 0.206  |
|    |       |       |        | 213 | → | 231 | -0.178 |
|    |       |       |        | 213 | → | 225 | 0.162  |
|    |       |       |        | 212 | → | 214 | -0.117 |
| 6  | 1.917 | 646.7 | 0.0174 | 210 | → | 214 | 0.264  |
|    |       |       |        | 210 | → | 216 | -0.258 |
|    |       |       |        | 210 | → | 232 | 0.258  |
|    |       |       |        | 211 | → | 232 | 0.221  |
|    |       |       |        | 210 | → | 224 | 0.203  |
|    |       |       |        | 211 | → | 214 | 0.196  |
|    |       |       |        | 211 | → | 216 | -0.185 |
|    |       |       |        | 210 | → | 229 | 0.170  |
|    |       |       |        | 211 | → | 229 | -0.157 |
|    |       |       |        | 211 | → | 224 | 0.155  |
| 7  | 2.074 | 597.9 | 0.0000 | 195 | → | 216 | 0.413  |
|    |       |       |        | 195 | → | 214 | 0.393  |
|    |       |       |        | 181 | → | 216 | 0.249  |
|    |       |       |        | 181 | → | 214 | 0.235  |
|    |       |       |        | 195 | → | 215 | 0.105  |
|    |       |       |        | 203 | → | 216 | -0.105 |
|    |       |       |        | 203 | → | 214 | -0.103 |
|    |       |       |        | 208 | → | 229 | 0.573  |
| 8  | 2.126 | 583.1 | 0.0000 | 210 | → | 229 | -0.317 |
|    |       |       |        | 211 | → | 229 | -0.267 |
|    |       |       |        | 208 | ← | 229 | -0.114 |
|    |       |       |        | 209 | → | 230 | 0.482  |
| 9  | 2.168 | 571.9 | 0.0004 | 213 | → | 230 | 0.411  |
|    |       |       |        | 212 | → | 230 | 0.177  |
|    |       |       |        | 209 | → | 231 | 0.165  |
|    |       |       |        | 213 | → | 231 | 0.147  |
|    |       |       |        | 213 | → | 214 | 0.243  |
| 10 | 2.277 | 544.4 | 0.0015 | 213 | → | 216 | 0.213  |
|    |       |       |        | 194 | → | 216 | 0.165  |
|    |       |       |        | 194 | → | 214 | 0.156  |
|    |       |       |        | 194 | → | 219 | -0.154 |
|    |       |       |        | 190 | → | 216 | 0.121  |
|    |       |       |        | 197 | → | 216 | 0.116  |
|    |       |       |        | 190 | → | 214 | 0.114  |
|    |       |       |        | 190 | → | 219 | -0.114 |
|    |       |       |        | 209 | → | 214 | -0.113 |
|    |       |       |        | 197 | → | 214 | 0.109  |
|    |       |       |        | 209 | → | 216 | -0.105 |
|    |       |       |        | 184 | → | 216 | 0.105  |
|    |       |       |        | 186 | → | 216 | 0.104  |
|    |       |       |        | 186 | → | 219 | -0.103 |



|    |       |       |        |     |   |     |        |
|----|-------|-------|--------|-----|---|-----|--------|
| 11 | 2.351 | 527.3 | 0.0032 | 184 | → | 219 | -0.103 |
|    |       |       |        | 197 | → | 219 | -0.102 |
|    |       |       |        | 212 | → | 214 | 0.100  |
|    |       |       |        | 211 | → | 229 | 0.491  |
|    |       |       |        | 210 | → | 229 | -0.357 |
|    |       |       |        | 210 | → | 214 | 0.185  |
|    |       |       |        | 208 | → | 216 | 0.147  |
|    |       |       |        | 211 | → | 214 | 0.131  |
| 12 | 2.361 | 525.2 | 0.0010 | 208 | → | 214 | -0.126 |
|    |       |       |        | 210 | → | 216 | 0.191  |
|    |       |       |        | 192 | → | 219 | 0.181  |
|    |       |       |        | 211 | → | 216 | 0.160  |
|    |       |       |        | 192 | → | 216 | 0.156  |
|    |       |       |        | 187 | → | 219 | 0.151  |
|    |       |       |        | 192 | → | 214 | 0.150  |
|    |       |       |        | 207 | → | 214 | 0.138  |
|    |       |       |        | 191 | → | 219 | -0.135 |
|    |       |       |        | 207 | → | 216 | 0.134  |
|    |       |       |        | 196 | → | 219 | -0.128 |
|    |       |       |        | 207 | → | 219 | 0.126  |
|    |       |       |        | 210 | → | 214 | 0.123  |
|    |       |       |        | 187 | → | 216 | 0.121  |
|    |       |       |        | 211 | → | 229 | -0.118 |
|    |       |       |        | 187 | → | 214 | 0.117  |
|    |       |       |        | 185 | → | 219 | -0.115 |
|    |       |       |        | 211 | → | 214 | 0.115  |
|    |       |       |        | 196 | → | 216 | -0.114 |
|    |       |       |        | 191 | → | 216 | -0.114 |
| 13 | 2.397 | 517.3 | 0.0062 | 208 | → | 214 | 0.112  |
|    |       |       |        | 196 | → | 214 | -0.110 |
|    |       |       |        | 191 | → | 214 | -0.109 |
|    |       |       |        | 212 | → | 230 | 0.495  |
|    |       |       |        | 213 | → | 230 | -0.278 |
|    |       |       |        | 213 | → | 215 | 0.251  |
|    |       |       |        | 209 | → | 215 | 0.174  |
| 14 | 2.485 | 498.9 | 0.0006 | 212 | → | 231 | 0.169  |
|    |       |       |        | 212 | → | 215 | 0.105  |
|    |       |       |        | 210 | → | 229 | 0.386  |
|    |       |       |        | 208 | → | 229 | 0.320  |
|    |       |       |        | 211 | → | 229 | 0.278  |
|    |       |       |        | 211 | → | 214 | -0.226 |
|    |       |       |        | 210 | → | 232 | -0.151 |
|    |       |       |        | 210 | → | 214 | 0.142  |
|    |       |       |        | 211 | → | 216 | 0.139  |
|    |       |       |        | 210 | → | 216 | -0.119 |
| 15 | 2.486 | 498.8 | 0.0008 | 211 | → | 232 | 0.111  |
|    |       |       |        | 212 | → | 215 | 0.324  |
|    |       |       |        | 209 | → | 230 | 0.312  |
|    |       |       |        | 213 | → | 230 | -0.261 |

|    |       |       |        |     |   |     |        |
|----|-------|-------|--------|-----|---|-----|--------|
|    |       |       |        | 212 | → | 230 | -0.224 |
|    |       |       |        | 213 | → | 231 | -0.218 |
|    |       |       |        | 212 | → | 214 | -0.138 |
|    |       |       |        | 212 | → | 231 | 0.137  |
|    |       |       |        | 213 | → | 215 | -0.114 |
|    |       |       |        | 213 | → | 214 | 0.107  |
|    |       |       |        | 213 | → | 217 | -0.104 |
| 16 | 2.516 | 492.8 | 0.0006 | 213 | → | 214 | 0.519  |
|    |       |       |        | 213 | → | 216 | 0.276  |
|    |       |       |        | 213 | → | 215 | 0.164  |
| 17 | 2.586 | 479.5 | 0.0001 | 194 | → | 219 | 0.112  |
|    |       |       |        | 212 | → | 214 | 0.557  |
|    |       |       |        | 212 | → | 216 | 0.341  |
|    |       |       |        | 212 | → | 215 | 0.167  |
| 18 | 2.605 | 476.0 | 0.0022 | 213 | → | 216 | 0.412  |
|    |       |       |        | 213 | → | 214 | -0.256 |
|    |       |       |        | 211 | → | 216 | 0.220  |
|    |       |       |        | 211 | → | 214 | 0.195  |
|    |       |       |        | 210 | → | 214 | 0.165  |
|    |       |       |        | 210 | → | 216 | 0.153  |
|    |       |       |        | 213 | → | 218 | 0.145  |
|    |       |       |        | 213 | → | 217 | -0.107 |
| 19 | 2.605 | 475.9 | 0.0008 | 213 | → | 216 | 0.359  |
|    |       |       |        | 211 | → | 216 | -0.259 |
|    |       |       |        | 211 | → | 214 | -0.230 |
|    |       |       |        | 213 | → | 214 | -0.214 |
|    |       |       |        | 210 | → | 214 | -0.188 |
|    |       |       |        | 210 | → | 216 | -0.177 |
|    |       |       |        | 192 | → | 219 | 0.127  |
|    |       |       |        | 213 | → | 218 | 0.124  |
| 20 | 2.619 | 473.5 | 0.0002 | 210 | → | 216 | 0.383  |
|    |       |       |        | 210 | → | 214 | 0.350  |
|    |       |       |        | 211 | → | 216 | -0.331 |
|    |       |       |        | 211 | → | 214 | -0.313 |
| 21 | 2.621 | 473.1 | 0.0204 | 213 | → | 217 | 0.369  |
|    |       |       |        | 213 | → | 218 | -0.282 |
|    |       |       |        | 213 | → | 215 | -0.262 |
|    |       |       |        | 213 | → | 216 | 0.240  |
|    |       |       |        | 209 | → | 215 | 0.188  |
|    |       |       |        | 213 | → | 231 | -0.168 |
|    |       |       |        | 209 | → | 231 | 0.110  |
| 22 | 2.651 | 467.7 | 0.0032 | 209 | → | 214 | 0.556  |
|    |       |       |        | 209 | → | 216 | 0.330  |
|    |       |       |        | 213 | → | 217 | 0.104  |
| 23 | 2.677 | 463.1 | 0.0351 | 209 | → | 215 | 0.346  |
|    |       |       |        | 213 | → | 217 | -0.299 |
|    |       |       |        | 213 | → | 218 | 0.234  |
|    |       |       |        | 209 | → | 231 | 0.218  |
|    |       |       |        | 213 | → | 215 | -0.212 |

|    |       |       |        |     |   |     |        |
|----|-------|-------|--------|-----|---|-----|--------|
| 24 | 2.702 | 458.8 | 0.0011 | 213 | → | 231 | -0.148 |
|    |       |       |        | 213 | → | 230 | 0.142  |
|    |       |       |        | 209 | → | 216 | 0.113  |
|    |       |       |        | 212 | → | 216 | 0.568  |
|    |       |       |        | 212 | → | 214 | -0.340 |
| 25 | 2.704 | 458.6 | 0.0019 | 212 | → | 218 | 0.132  |
|    |       |       |        | 211 | → | 215 | 0.442  |
|    |       |       |        | 210 | → | 215 | 0.344  |
|    |       |       |        | 211 | → | 217 | 0.209  |
|    |       |       |        | 210 | → | 217 | 0.204  |
| 26 | 2.718 | 456.2 | 0.0032 | 210 | → | 218 | 0.140  |
|    |       |       |        | 211 | → | 218 | 0.136  |
|    |       |       |        | 211 | → | 215 | 0.434  |
|    |       |       |        | 210 | → | 217 | -0.328 |
|    |       |       |        | 210 | → | 218 | -0.254 |
| 27 | 2.721 | 455.7 | 0.0012 | 210 | → | 215 | -0.195 |
|    |       |       |        | 211 | → | 214 | -0.158 |
|    |       |       |        | 208 | → | 214 | -0.111 |
|    |       |       |        | 211 | → | 216 | 0.104  |
|    |       |       |        | 212 | → | 217 | 0.405  |
| 28 | 2.725 | 455.1 | 0.0035 | 212 | → | 218 | -0.328 |
|    |       |       |        | 213 | → | 231 | -0.172 |
|    |       |       |        | 212 | → | 216 | 0.164  |
|    |       |       |        | 209 | → | 215 | -0.162 |
|    |       |       |        | 212 | → | 215 | -0.147 |
| 29 | 2.736 | 453.3 | 0.0002 | 212 | → | 231 | -0.134 |
|    |       |       |        | 209 | → | 231 | -0.133 |
|    |       |       |        | 209 | → | 230 | 0.113  |
|    |       |       |        | 210 | → | 215 | 0.489  |
|    |       |       |        | 211 | → | 217 | -0.296 |
| 30 | 2.744 | 451.8 | 0.0003 | 211 | → | 218 | -0.235 |
|    |       |       |        | 210 | → | 214 | -0.183 |
|    |       |       |        | 210 | → | 218 | -0.140 |
|    |       |       |        | 210 | → | 217 | -0.124 |
|    |       |       |        | 211 | → | 217 | 0.325  |
|    |       |       |        | 211 | → | 218 | 0.287  |
|    |       |       |        | 211 | → | 215 | -0.217 |
|    |       |       |        | 210 | → | 215 | 0.215  |
|    |       |       |        | 208 | → | 214 | -0.203 |
|    |       |       |        | 210 | → | 217 | -0.150 |
|    |       |       |        | 210 | → | 216 | 0.147  |
|    |       |       |        | 210 | → | 229 | 0.139  |
|    |       |       |        | 210 | → | 218 | -0.139 |
|    |       |       |        | 211 | → | 214 | 0.138  |
|    |       |       |        | 210 | → | 214 | -0.135 |
|    |       |       |        | 210 | → | 232 | 0.125  |
|    |       |       |        | 208 | → | 214 | 0.445  |
|    |       |       |        | 208 | → | 216 | 0.409  |
|    |       |       |        | 210 | → | 217 | -0.153 |

|    |       |       |        |     |   |     |        |
|----|-------|-------|--------|-----|---|-----|--------|
| 31 | 2.774 | 447.0 | 0.0013 | 210 | → | 218 | -0.137 |
|    |       |       |        | 211 | → | 215 | -0.124 |
|    |       |       |        | 208 | → | 215 | 0.100  |
|    |       |       |        | 209 | → | 216 | 0.570  |
|    |       |       |        | 209 | → | 214 | -0.349 |
| 32 | 2.802 | 442.5 | 0.0497 | 209 | → | 215 | -0.154 |
|    |       |       |        | 209 | → | 217 | 0.273  |
|    |       |       |        | 208 | → | 216 | 0.273  |
|    |       |       |        | 208 | → | 232 | 0.248  |
|    |       |       |        | 209 | → | 218 | -0.221 |
|    |       |       |        | 208 | → | 217 | -0.181 |
|    |       |       |        | 208 | → | 218 | -0.155 |
|    |       |       |        | 210 | → | 217 | 0.153  |
|    |       |       |        | 208 | → | 214 | -0.143 |
|    |       |       |        | 210 | → | 218 | 0.119  |
| 33 | 2.805 | 442.0 | 0.0029 | 212 | → | 217 | -0.116 |
|    |       |       |        | 208 | → | 224 | 0.113  |
|    |       |       |        | 209 | → | 217 | 0.341  |
|    |       |       |        | 209 | → | 218 | -0.278 |
|    |       |       |        | 208 | → | 216 | -0.223 |
|    |       |       |        | 208 | → | 232 | -0.202 |
|    |       |       |        | 208 | → | 217 | 0.157  |
|    |       |       |        | 212 | → | 217 | -0.135 |
|    |       |       |        | 208 | → | 218 | 0.134  |
|    |       |       |        | 208 | → | 214 | 0.117  |
| 34 | 2.836 | 437.2 | 0.0003 | 210 | → | 217 | -0.114 |
|    |       |       |        | 212 | → | 215 | -0.107 |
|    |       |       |        | 209 | → | 231 | 0.308  |
|    |       |       |        | 212 | → | 230 | -0.289 |
|    |       |       |        | 213 | → | 231 | 0.220  |
|    |       |       |        | 212 | → | 231 | -0.209 |
|    |       |       |        | 209 | → | 215 | 0.192  |
|    |       |       |        | 213 | → | 230 | -0.180 |
|    |       |       |        | 213 | → | 215 | 0.176  |
|    |       |       |        | 213 | → | 225 | -0.162 |
| 35 | 2.852 | 434.7 | 0.0108 | 209 | → | 230 | 0.126  |
|    |       |       |        | 212 | → | 217 | 0.126  |
|    |       |       |        | 209 | → | 225 | -0.123 |
|    |       |       |        | 212 | → | 231 | 0.312  |
|    |       |       |        | 209 | → | 217 | 0.241  |
|    |       |       |        | 209 | → | 230 | -0.237 |
|    |       |       |        | 212 | → | 215 | 0.230  |
|    |       |       |        | 212 | → | 217 | 0.213  |
|    |       |       |        | 213 | → | 230 | 0.201  |
|    |       |       |        | 209 | → | 218 | -0.192 |
|    |       |       |        | 212 | → | 225 | -0.181 |
|    |       |       |        | 212 | → | 218 | -0.152 |
|    |       |       |        | 213 | → | 231 | 0.121  |
|    |       |       |        | 212 | → | 230 | -0.117 |
|    |       |       |        |     |   |     |        |

|    |       |       |        |     |   |     |        |
|----|-------|-------|--------|-----|---|-----|--------|
| 36 | 2.856 | 434.1 | 0.001  | 208 | → | 215 | 0.576  |
|    |       |       |        | 208 | → | 214 | -0.194 |
|    |       |       |        | 208 | → | 217 | 0.168  |
|    |       |       |        | 211 | → | 232 | -0.106 |
| 37 | 2.864 | 432.9 | 0      | 210 | → | 232 | 0.104  |
|    |       |       |        | 211 | → | 232 | 0.323  |
|    |       |       |        | 208 | → | 215 | 0.292  |
|    |       |       |        | 210 | → | 229 | -0.189 |
|    |       |       |        | 211 | → | 217 | 0.185  |
|    |       |       |        | 211 | → | 216 | 0.178  |
|    |       |       |        | 211 | → | 224 | 0.172  |
|    |       |       |        | 210 | → | 232 | -0.159 |
|    |       |       |        | 208 | → | 229 | -0.155 |
|    |       |       |        | 211 | → | 218 | 0.148  |
|    |       |       |        | 211 | → | 214 | -0.119 |
|    |       |       |        | 210 | → | 216 | -0.118 |
|    |       |       |        | 208 | → | 218 | -0.111 |
|    |       |       |        | 208 | → | 217 | -0.103 |
| 38 | 2.881 | 430.3 | 0.0007 | 213 | → | 219 | 0.528  |
|    |       |       |        | 213 | → | 218 | 0.161  |
|    |       |       |        | 209 | → | 216 | 0.127  |
|    |       |       |        | 212 | → | 219 | 0.120  |
|    |       |       |        | 209 | → | 219 | -0.111 |
|    |       |       |        | 194 | → | 216 | 0.109  |
| 39 | 2.893 | 428.6 | 0.0224 | 194 | → | 214 | 0.105  |
|    |       |       |        | 208 | → | 217 | 0.355  |
|    |       |       |        | 208 | → | 218 | 0.295  |
|    |       |       |        | 211 | → | 232 | 0.229  |
|    |       |       |        | 210 | → | 232 | 0.164  |
|    |       |       |        | 208 | → | 215 | -0.158 |
|    |       |       |        | 211 | → | 216 | 0.155  |
|    |       |       |        | 211 | → | 224 | 0.143  |
|    |       |       |        | 211 | → | 214 | -0.134 |
|    |       |       |        | 210 | → | 216 | 0.126  |
|    |       |       |        | 210 | → | 214 | -0.117 |
|    |       |       |        | 210 | → | 217 | 0.109  |
|    |       |       |        | 210 | → | 229 | -0.109 |
|    |       |       |        | 210 | → | 224 | 0.108  |
| 40 | 2.931 | 423.0 | 0.0024 | 210 | → | 219 | 0.257  |
|    |       |       |        | 211 | → | 219 | 0.226  |
|    |       |       |        | 207 | → | 214 | -0.171 |
|    |       |       |        | 207 | → | 216 | -0.163 |
|    |       |       |        | 210 | → | 216 | 0.156  |
|    |       |       |        | 192 | → | 216 | -0.142 |
|    |       |       |        | 192 | → | 214 | -0.135 |
|    |       |       |        | 208 | → | 216 | 0.123  |
|    |       |       |        | 207 | → | 219 | 0.122  |
|    |       |       |        | 196 | → | 216 | 0.115  |
|    |       |       |        | 211 | → | 216 | 0.114  |

|    |       |       |        |     |   |     |        |
|----|-------|-------|--------|-----|---|-----|--------|
|    |       |       |        | 208 | → | 214 | 0.109  |
|    |       |       |        | 196 | → | 214 | 0.108  |
|    |       |       |        | 187 | → | 216 | -0.107 |
|    |       |       |        | 210 | → | 218 | 0.106  |
|    |       |       |        | 192 | → | 219 | 0.103  |
|    |       |       |        | 187 | → | 214 | -0.101 |
|    |       |       |        | 191 | → | 216 | 0.100  |
| 41 | 2.946 | 420.9 | 0.0001 | 213 | → | 218 | 0.507  |
|    |       |       |        | 213 | → | 217 | 0.451  |
|    |       |       |        | 213 | → | 219 | -0.148 |
| 42 | 2.958 | 419.2 | 0.0055 | 208 | → | 232 | 0.276  |
|    |       |       |        | 210 | → | 232 | -0.273 |
|    |       |       |        | 208 | → | 217 | 0.254  |
|    |       |       |        | 208 | → | 218 | 0.211  |
|    |       |       |        | 208 | → | 216 | 0.193  |
|    |       |       |        | 210 | → | 224 | -0.177 |
|    |       |       |        | 211 | → | 229 | -0.168 |
|    |       |       |        | 210 | → | 216 | -0.154 |
|    |       |       |        | 210 | → | 214 | 0.141  |
|    |       |       |        | 208 | → | 224 | 0.137  |
|    |       |       |        | 210 | → | 217 | -0.132 |
| 43 | 3.003 | 412.9 | 0.0001 | 212 | → | 219 | 0.534  |
|    |       |       |        | 213 | → | 219 | -0.301 |
|    |       |       |        | 212 | → | 218 | 0.191  |
|    |       |       |        | 209 | → | 219 | -0.180 |
| 44 | 3.041 | 407.7 | 0.0003 | 212 | → | 218 | 0.504  |
|    |       |       |        | 212 | → | 217 | 0.440  |
|    |       |       |        | 212 | → | 219 | -0.152 |
| 45 | 3.052 | 406.2 | 0.0001 | 211 | → | 219 | 0.435  |
|    |       |       |        | 210 | → | 219 | -0.347 |
|    |       |       |        | 211 | → | 218 | 0.319  |
|    |       |       |        | 211 | → | 217 | -0.221 |
|    |       |       |        | 210 | → | 218 | -0.158 |
| 46 | 3.065 | 404.5 | 0      | 210 | → | 218 | 0.378  |
|    |       |       |        | 211 | → | 218 | 0.335  |
|    |       |       |        | 210 | → | 217 | -0.309 |
|    |       |       |        | 211 | → | 217 | -0.291 |
|    |       |       |        | 211 | → | 219 | -0.160 |
|    |       |       |        | 209 | → | 219 | 0.106  |
| 47 | 3.067 | 404.3 | 0      | 209 | → | 219 | 0.486  |
|    |       |       |        | 212 | → | 219 | 0.359  |
|    |       |       |        | 209 | → | 218 | 0.164  |
|    |       |       |        | 213 | → | 219 | 0.164  |
| 48 | 3.084 | 402.0 | 0      | 210 | → | 218 | 0.341  |
|    |       |       |        | 211 | → | 219 | 0.322  |
|    |       |       |        | 210 | → | 217 | -0.299 |
|    |       |       |        | 211 | → | 218 | -0.267 |
|    |       |       |        | 211 | → | 217 | 0.249  |
|    |       |       |        | 210 | → | 219 | -0.230 |

|    |       |       |        |     |   |     |        |
|----|-------|-------|--------|-----|---|-----|--------|
| 49 | 3.112 | 398.4 | 0      | 209 | → | 218 | 0.503  |
|    |       |       |        | 209 | → | 217 | 0.451  |
|    |       |       |        | 209 | → | 219 | -0.150 |
| 50 | 3.120 | 397.4 | 0.0005 | 210 | → | 219 | 0.468  |
|    |       |       |        | 211 | → | 219 | 0.319  |
|    |       |       |        | 208 | → | 219 | -0.193 |
|    |       |       |        | 192 | → | 219 | -0.132 |
|    |       |       |        | 187 | → | 219 | -0.109 |
|    |       |       |        | 207 | → | 219 | -0.102 |
| 51 | 3.188 | 389.0 | 0.002  | 209 | → | 219 | 0.392  |
|    |       |       |        | 194 | → | 219 | 0.216  |
|    |       |       |        | 213 | → | 219 | -0.168 |
|    |       |       |        | 197 | → | 219 | 0.156  |
|    |       |       |        | 190 | → | 219 | 0.148  |
|    |       |       |        | 212 | → | 219 | -0.144 |
|    |       |       |        | 186 | → | 219 | 0.140  |
|    |       |       |        | 184 | → | 219 | 0.125  |
|    |       |       |        | 206 | → | 219 | -0.119 |
|    |       |       |        | 192 | → | 219 | 0.110  |
|    |       |       |        | 200 | → | 219 | -0.105 |
|    |       |       |        | 208 | → | 219 | 0.405  |
| 52 | 3.201 | 387.3 | 0.0001 | 208 | → | 218 | 0.433  |
|    |       |       |        | 208 | → | 217 | -0.318 |
|    |       |       |        | 208 | → | 219 | 0.522  |
| 53 | 3.223 | 384.7 | 0.0001 | 208 | → | 218 | -0.321 |
|    |       |       |        | 208 | → | 217 | 0.317  |
|    |       |       |        | 208 | → | 219 | 0.556  |
| 54 | 3.276 | 378.5 | 0      | 195 | → | 219 | 0.296  |
|    |       |       |        | 203 | → | 219 | -0.193 |
|    |       |       |        | 195 | → | 218 | 0.119  |
|    |       |       |        | 202 | → | 219 | 0.116  |
|    |       |       |        | 207 | → | 214 | 0.491  |
| 55 | 3.413 | 363.3 | 0.5426 | 207 | → | 216 | -0.449 |
|    |       |       |        | 207 | → | 215 | 0.145  |
|    |       |       |        | 206 | → | 215 | -0.117 |
|    |       |       |        | 206 | → | 215 | 0.642  |
| 56 | 3.541 | 350.2 | 0.1116 | 206 | → | 214 | -0.217 |
|    |       |       |        | 204 | → | 214 | 0.397  |
| 57 | 3.642 | 340.5 | 0.0418 | 204 | → | 216 | -0.311 |
|    |       |       |        | 207 | → | 217 | 0.247  |
|    |       |       |        | 207 | → | 218 | 0.195  |
|    |       |       |        | 203 | → | 214 | 0.183  |
|    |       |       |        | 207 | → | 215 | 0.138  |
|    |       |       |        | 205 | → | 215 | 0.124  |
|    |       |       |        | 204 | → | 215 | 0.115  |
|    |       |       |        | 207 | → | 214 | -0.109 |
|    |       |       |        | 205 | → | 215 | 0.626  |
|    |       |       |        | 205 | → | 214 | -0.215 |
| 58 | 3.650 | 339.7 | 0.0876 | 207 | → | 215 | 0.554  |
| 59 | 3.666 | 338.2 | 0.0007 |     |   |     |        |

|    |       |       |        |     |   |     |        |
|----|-------|-------|--------|-----|---|-----|--------|
| 60 | 3.693 | 335.8 | 0.0032 | 207 | → | 214 | -0.270 |
|    |       |       |        | 204 | → | 214 | -0.198 |
|    |       |       |        | 204 | → | 216 | 0.175  |
|    |       |       |        | 207 | → | 216 | -0.130 |
|    |       |       |        | 207 | → | 215 | 0.340  |
|    |       |       |        | 207 | → | 216 | 0.285  |
|    |       |       |        | 207 | → | 217 | -0.248 |
|    |       |       |        | 204 | → | 214 | 0.216  |
|    |       |       |        | 207 | → | 218 | -0.201 |
|    |       |       |        | 204 | → | 216 | -0.189 |
|    |       |       |        | 207 | → | 214 | 0.141  |
|    |       |       |        | 203 | → | 214 | -0.124 |
|    |       |       |        | 207 | → | 216 | 0.330  |
| 61 | 3.713 | 333.9 | 0.0084 | 207 | → | 217 | 0.302  |
|    |       |       |        | 207 | → | 218 | 0.250  |
|    |       |       |        | 207 | → | 214 | 0.250  |
|    |       |       |        | 203 | → | 214 | 0.150  |
|    |       |       |        | 204 | → | 214 | -0.144 |
|    |       |       |        | 204 | → | 216 | 0.134  |
|    |       |       |        | 203 | → | 216 | -0.120 |
| 62 | 3.738 | 331.7 | 0.0007 | 202 | → | 214 | 0.345  |
|    |       |       |        | 202 | → | 216 | 0.306  |
|    |       |       |        | 206 | → | 214 | 0.253  |
|    |       |       |        | 203 | → | 214 | 0.220  |
|    |       |       |        | 203 | → | 216 | 0.215  |
|    |       |       |        | 204 | → | 216 | 0.164  |
|    |       |       |        | 206 | → | 216 | 0.144  |
|    |       |       |        | 205 | → | 214 | -0.113 |
|    |       |       |        | 205 | → | 216 | -0.108 |
|    |       |       |        | 213 | → | 220 | 0.674  |
| 63 | 3.745 | 331.1 | 0.0048 | 213 | → | 221 | 0.158  |
| 64 | 3.769 | 328.9 | 0.0009 | 206 | → | 214 | 0.416  |
|    |       |       |        | 203 | → | 214 | -0.311 |
|    |       |       |        | 203 | → | 216 | -0.273 |
|    |       |       |        | 204 | → | 216 | -0.153 |
|    |       |       |        | 206 | → | 216 | 0.145  |
|    |       |       |        | 213 | → | 221 | -0.145 |
|    |       |       |        | 206 | → | 215 | 0.142  |
|    |       |       |        | 213 | → | 221 | 0.629  |
| 65 | 3.773 | 328.6 | 0.0043 | 213 | → | 220 | -0.178 |
|    |       |       |        | 213 | → | 222 | 0.126  |
|    |       |       |        | 202 | → | 214 | 0.302  |
| 66 | 3.801 | 326.2 | 0.0458 | 202 | → | 215 | -0.298 |
|    |       |       |        | 206 | → | 214 | -0.239 |
|    |       |       |        | 206 | → | 217 | 0.203  |
|    |       |       |        | 203 | → | 214 | -0.203 |
|    |       |       |        | 202 | → | 216 | 0.161  |
|    |       |       |        | 206 | → | 218 | -0.161 |
|    |       |       |        | 203 | → | 216 | -0.139 |



|    |       |       |        |     |   |     |        |
|----|-------|-------|--------|-----|---|-----|--------|
| 67 | 3.813 | 325.2 | 0.0363 | 205 | → | 215 | -0.117 |
|    |       |       |        | 205 | → | 214 | -0.113 |
|    |       |       |        | 202 | → | 215 | 0.370  |
|    |       |       |        | 206 | → | 214 | -0.303 |
|    |       |       |        | 205 | → | 214 | -0.188 |
|    |       |       |        | 206 | → | 218 | 0.186  |
|    |       |       |        | 206 | → | 217 | -0.179 |
|    |       |       |        | 202 | → | 216 | 0.178  |
|    |       |       |        | 206 | → | 216 | 0.146  |
|    |       |       |        | 203 | → | 215 | -0.133 |
|    |       |       |        | 206 | → | 215 | -0.125 |
|    |       |       |        | 203 | → | 214 | -0.106 |
|    |       |       |        | 203 | → | 216 | -0.103 |
|    |       |       |        | 211 | → | 220 | 0.458  |
| 68 | 3.824 | 324.2 | 0.0015 | 211 | → | 221 | -0.345 |
|    |       |       |        | 211 | → | 232 | -0.220 |
|    |       |       |        | 210 | → | 220 | -0.169 |
|    |       |       |        | 211 | → | 222 | 0.156  |
|    |       |       |        | 210 | → | 221 | 0.139  |
|    |       |       |        | 210 | → | 222 | -0.110 |
|    |       |       |        | 210 | → | 232 | 0.107  |
| 69 | 3.832 | 323.6 | 0.0019 | 212 | → | 220 | 0.580  |
|    |       |       |        | 212 | → | 221 | 0.278  |
|    |       |       |        | 213 | → | 223 | -0.139 |
| 70 | 3.850 | 322.1 | 0.0046 | 212 | → | 231 | 0.135  |
|    |       |       |        | 206 | → | 216 | 0.619  |
|    |       |       |        | 202 | → | 215 | -0.142 |
|    |       |       |        | 206 | → | 214 | -0.120 |
|    |       |       |        | 202 | → | 216 | -0.111 |
| 71 | 3.862 | 321.0 | 0.0111 | 205 | → | 216 | 0.108  |
|    |       |       |        | 210 | → | 220 | 0.578  |
|    |       |       |        | 211 | → | 220 | 0.317  |
|    |       |       |        | 210 | → | 221 | -0.159 |
| 72 | 3.863 | 321.0 | 0.0001 | 210 | → | 232 | -0.131 |
|    |       |       |        | 212 | → | 221 | 0.489  |
|    |       |       |        | 212 | → | 220 | -0.364 |
|    |       |       |        | 213 | → | 223 | -0.260 |
| 73 | 3.881 | 319.4 | 0.014  | 213 | → | 222 | -0.125 |
|    |       |       |        | 213 | → | 223 | 0.508  |
|    |       |       |        | 212 | → | 221 | 0.322  |
|    |       |       |        | 213 | → | 222 | 0.299  |
| 74 | 3.891 | 318.6 | 0.0049 | 213 | → | 231 | 0.109  |
|    |       |       |        | 211 | → | 221 | 0.531  |
|    |       |       |        | 211 | → | 220 | 0.352  |
|    |       |       |        | 210 | → | 221 | 0.232  |
| 75 | 3.898 | 318.1 | 0.005  | 210 | → | 220 | -0.113 |
|    |       |       |        | 209 | → | 220 | 0.559  |
|    |       |       |        | 209 | → | 221 | 0.330  |
|    |       |       |        | 209 | → | 231 | 0.146  |

|    |       |       |        |     |   |     |        |
|----|-------|-------|--------|-----|---|-----|--------|
| 76 | 3.902 | 317.8 | 0.0021 | 209 | → | 222 | 0.116  |
|    |       |       |        | 209 | → | 223 | 0.113  |
|    |       |       |        | 210 | → | 221 | 0.557  |
|    |       |       |        | 210 | → | 220 | 0.311  |
|    |       |       |        | 211 | → | 220 | -0.201 |
| 77 | 3.913 | 316.8 | 0.1515 | 211 | → | 222 | 0.145  |
|    |       |       |        | 203 | → | 216 | 0.424  |
|    |       |       |        | 203 | → | 214 | -0.346 |
|    |       |       |        | 207 | → | 217 | 0.286  |
|    |       |       |        | 207 | → | 218 | 0.144  |
| 78 | 3.928 | 315.7 | 0.001  | 204 | → | 214 | 0.114  |
|    |       |       |        | 210 | → | 222 | -0.103 |
|    |       |       |        | 213 | → | 222 | 0.578  |
|    |       |       |        | 213 | → | 223 | -0.335 |
|    |       |       |        | 205 | → | 214 | 0.128  |
| 79 | 3.930 | 315.5 | 0.0006 | 213 | → | 221 | -0.108 |
|    |       |       |        | 205 | → | 214 | 0.533  |
|    |       |       |        | 205 | → | 216 | 0.214  |
|    |       |       |        | 202 | → | 216 | 0.198  |
|    |       |       |        | 202 | → | 214 | 0.187  |
| 80 | 3.934 | 315.2 | 0.0013 | 205 | → | 215 | 0.178  |
|    |       |       |        | 213 | → | 222 | -0.135 |
|    |       |       |        | 209 | → | 221 | 0.544  |
|    |       |       |        | 209 | → | 220 | -0.391 |
|    |       |       |        | 209 | → | 222 | 0.116  |
| 81 | 3.937 | 315.0 | 0.0097 | 211 | → | 222 | 0.595  |
|    |       |       |        | 210 | → | 222 | 0.262  |
|    |       |       |        | 211 | → | 221 | 0.146  |
|    |       |       |        | 210 | → | 221 | -0.120 |
|    |       |       |        | 211 | → | 223 | -0.108 |
| 82 | 3.938 | 314.9 | 0.004  | 210 | → | 222 | 0.589  |
|    |       |       |        | 210 | → | 221 | 0.205  |
|    |       |       |        | 211 | → | 222 | -0.190 |
|    |       |       |        | 211 | → | 221 | -0.163 |
|    |       |       |        | 210 | → | 223 | -0.119 |
| 83 | 3.949 | 314.0 | 0.0287 | 212 | → | 223 | 0.466  |
|    |       |       |        | 206 | → | 217 | -0.281 |
|    |       |       |        | 206 | → | 218 | 0.219  |
|    |       |       |        | 202 | → | 215 | -0.211 |
|    |       |       |        | 212 | → | 222 | 0.176  |
| 84 | 3.957 | 313.3 | 0.0204 | 212 | → | 221 | -0.164 |
|    |       |       |        | 212 | → | 231 | 0.101  |
|    |       |       |        | 208 | → | 220 | 0.320  |
|    |       |       |        | 212 | → | 223 | -0.278 |
|    |       |       |        | 206 | → | 217 | -0.252 |
|    |       |       |        | 208 | → | 221 | -0.252 |
|    |       |       |        | 202 | → | 215 | -0.200 |
|    |       |       |        | 206 | → | 218 | 0.192  |
|    |       |       |        | 208 | → | 232 | -0.163 |

|    |       |       |        |     |   |     |        |
|----|-------|-------|--------|-----|---|-----|--------|
| 85 | 3.957 | 313.3 | 0.0342 | 208 | → | 222 | 0.141  |
|    |       |       |        | 212 | → | 222 | -0.127 |
|    |       |       |        | 208 | → | 220 | 0.348  |
|    |       |       |        | 208 | → | 221 | -0.275 |
|    |       |       |        | 206 | → | 217 | 0.247  |
|    |       |       |        | 212 | → | 223 | 0.230  |
|    |       |       |        | 202 | → | 215 | 0.196  |
|    |       |       |        | 206 | → | 218 | -0.188 |
|    |       |       |        | 208 | → | 232 | -0.177 |
|    |       |       |        | 208 | → | 222 | 0.154  |
| 86 | 3.968 | 312.5 | 0.0038 | 212 | → | 222 | 0.108  |
|    |       |       |        | 204 | → | 216 | 0.478  |
|    |       |       |        | 204 | → | 214 | 0.410  |
|    |       |       |        | 203 | → | 216 | -0.261 |
| 87 | 3.991 | 310.7 | 0.0007 | 203 | → | 214 | -0.100 |
|    |       |       |        | 205 | → | 216 | 0.606  |
|    |       |       |        | 205 | → | 214 | -0.238 |
| 88 | 4.008 | 309.3 | 0.0011 | 202 | → | 214 | 0.173  |
|    |       |       |        | 204 | → | 215 | 0.612  |
|    |       |       |        | 203 | → | 215 | 0.266  |
|    |       |       |        | 204 | → | 214 | -0.110 |
| 89 | 4.022 | 308.3 | 0.0019 | 203 | → | 214 | -0.100 |
|    |       |       |        | 209 | → | 223 | 0.586  |
|    |       |       |        | 209 | → | 222 | 0.240  |
|    |       |       |        | 209 | → | 221 | -0.224 |
| 90 | 4.024 | 308.1 | 0.0003 | 209 | → | 231 | 0.131  |
|    |       |       |        | 212 | → | 222 | 0.631  |
| 91 | 4.030 | 307.6 | 0.0018 | 212 | → | 223 | -0.280 |
|    |       |       |        | 207 | → | 218 | 0.491  |
|    |       |       |        | 207 | → | 217 | -0.357 |
|    |       |       |        | 208 | → | 220 | 0.235  |
| 92 | 4.033 | 307.4 | 0.0006 | 208 | → | 221 | 0.226  |
|    |       |       |        | 208 | → | 220 | 0.434  |
|    |       |       |        | 208 | → | 221 | 0.406  |
|    |       |       |        | 207 | → | 218 | -0.264 |
|    |       |       |        | 207 | → | 217 | 0.193  |
|    |       |       |        | 208 | → | 222 | -0.162 |
| 93 | 4.070 | 304.6 | 0.0599 | 205 | → | 217 | 0.522  |
|    |       |       |        | 205 | → | 218 | -0.414 |
|    |       |       |        | 202 | → | 215 | 0.138  |
| 94 | 4.071 | 304.6 | 0.0002 | 208 | → | 222 | 0.593  |
|    |       |       |        | 208 | → | 221 | 0.313  |
|    |       |       |        | 208 | → | 223 | -0.129 |
| 95 | 4.076 | 304.2 | 0.0005 | 207 | → | 219 | 0.632  |
|    |       |       |        | 192 | → | 219 | -0.131 |
|    |       |       |        | 187 | → | 219 | -0.129 |
| 96 | 4.095 | 302.8 | 0.0001 | 209 | → | 222 | 0.632  |
|    |       |       |        | 209 | → | 223 | -0.283 |
|    |       |       |        | 209 | → | 221 | -0.101 |

|     |       |       |        |     |   |     |        |
|-----|-------|-------|--------|-----|---|-----|--------|
| 97  | 4.103 | 302.2 | 0.0158 | 211 | → | 223 | 0.473  |
|     |       |       |        | 210 | → | 223 | 0.314  |
|     |       |       |        | 204 | → | 217 | -0.300 |
|     |       |       |        | 204 | → | 218 | -0.233 |
| 98  | 4.104 | 302.1 | 0.024  | 204 | → | 217 | 0.425  |
|     |       |       |        | 204 | → | 218 | 0.327  |
|     |       |       |        | 210 | → | 223 | 0.288  |
|     |       |       |        | 211 | → | 223 | 0.276  |
|     |       |       |        | 203 | → | 215 | -0.144 |
| 99  | 4.118 | 301.1 | 0.0003 | 210 | → | 223 | 0.537  |
|     |       |       |        | 211 | → | 223 | -0.410 |
|     |       |       |        | 210 | → | 222 | 0.118  |
| 100 | 4.123 | 300.7 | 0.0045 | 203 | → | 215 | 0.505  |
|     |       |       |        | 204 | → | 215 | -0.290 |
|     |       |       |        | 202 | → | 215 | 0.165  |
|     |       |       |        | 203 | → | 214 | -0.163 |
|     |       |       |        | 204 | → | 217 | 0.144  |
|     |       |       |        | 202 | → | 219 | -0.131 |
|     |       |       |        | 204 | → | 218 | 0.127  |
|     |       |       |        | 203 | → | 219 | -0.124 |
| 101 | 4.141 | 299.4 | 0.0012 | 202 | → | 216 | 0.490  |
|     |       |       |        | 202 | → | 214 | -0.399 |
|     |       |       |        | 205 | → | 216 | 0.160  |
|     |       |       |        | 202 | → | 215 | -0.128 |
|     |       |       |        | 203 | → | 216 | -0.115 |
| 102 | 4.175 | 297.0 | 0.0004 | 206 | → | 218 | 0.474  |
|     |       |       |        | 206 | → | 217 | 0.362  |
|     |       |       |        | 202 | → | 219 | 0.218  |
|     |       |       |        | 206 | → | 219 | 0.211  |
| 103 | 4.179 | 296.7 | 0.0509 | 201 | → | 214 | 0.467  |
|     |       |       |        | 201 | → | 216 | -0.407 |
|     |       |       |        | 201 | → | 215 | 0.141  |
|     |       |       |        | 200 | → | 215 | 0.108  |
| 104 | 4.186 | 296.2 | 0.0035 | 202 | → | 219 | 0.379  |
|     |       |       |        | 206 | → | 219 | 0.356  |
|     |       |       |        | 206 | → | 218 | -0.244 |
|     |       |       |        | 206 | → | 217 | -0.233 |
|     |       |       |        | 203 | → | 219 | 0.140  |
|     |       |       |        | 205 | → | 219 | -0.131 |
|     |       |       |        | 203 | → | 215 | 0.130  |
|     |       |       |        | 204 | → | 219 | 0.107  |
| 105 | 4.194 | 295.6 | 0.0026 | 213 | → | 225 | 0.446  |
|     |       |       |        | 212 | → | 225 | -0.253 |
|     |       |       |        | 200 | → | 215 | 0.249  |
|     |       |       |        | 213 | → | 231 | 0.230  |
|     |       |       |        | 199 | → | 215 | 0.121  |
| 106 | 4.209 | 294.6 | 0.0169 | 212 | → | 223 | 0.114  |
|     |       |       |        | 211 | → | 224 | 0.453  |
|     |       |       |        | 210 | → | 224 | -0.283 |

|     |       |       |        |     |   |     |        |
|-----|-------|-------|--------|-----|---|-----|--------|
|     |       |       |        | 211 | → | 232 | -0.218 |
|     |       |       |        | 200 | → | 215 | -0.158 |
|     |       |       |        | 210 | → | 232 | 0.141  |
|     |       |       |        | 211 | → | 222 | -0.116 |
|     |       |       |        | 211 | → | 221 | 0.114  |
| 107 | 4.212 | 294.4 | 0.0259 | 200 | → | 215 | 0.422  |
|     |       |       |        | 199 | → | 215 | 0.250  |
|     |       |       |        | 213 | → | 225 | -0.190 |
|     |       |       |        | 200 | → | 214 | -0.152 |
|     |       |       |        | 211 | → | 224 | 0.142  |
|     |       |       |        | 212 | → | 225 | 0.141  |
|     |       |       |        | 206 | → | 219 | 0.126  |
| 108 | 4.219 | 293.9 | 0.0022 | 210 | → | 224 | -0.114 |
|     |       |       |        | 206 | → | 219 | 0.484  |
|     |       |       |        | 203 | → | 219 | -0.244 |
|     |       |       |        | 202 | → | 219 | -0.232 |
|     |       |       |        | 199 | → | 215 | -0.159 |
|     |       |       |        | 204 | → | 219 | -0.150 |
|     |       |       |        | 200 | → | 215 | -0.138 |
|     |       |       |        | 205 | → | 219 | 0.100  |
| 109 | 4.252 | 291.6 | 0.0009 | 199 | → | 215 | 0.341  |
|     |       |       |        | 212 | → | 225 | -0.296 |
|     |       |       |        | 213 | → | 226 | -0.254 |
|     |       |       |        | 213 | → | 227 | -0.190 |
|     |       |       |        | 203 | → | 219 | -0.171 |
|     |       |       |        | 200 | → | 215 | -0.165 |
|     |       |       |        | 212 | → | 231 | -0.131 |
|     |       |       |        | 199 | → | 214 | -0.116 |
|     |       |       |        | 213 | → | 225 | -0.102 |
| 110 | 4.253 | 291.5 | 0.0004 | 208 | → | 223 | 0.681  |
|     |       |       |        | 208 | → | 222 | 0.150  |
| 111 | 4.256 | 291.3 | 0.0102 | 213 | → | 226 | 0.362  |
|     |       |       |        | 199 | → | 215 | 0.268  |
|     |       |       |        | 213 | → | 227 | 0.262  |
|     |       |       |        | 203 | → | 219 | -0.224 |
|     |       |       |        | 212 | → | 225 | 0.181  |
|     |       |       |        | 200 | → | 215 | -0.141 |
|     |       |       |        | 205 | → | 219 | -0.121 |
|     |       |       |        | 204 | → | 219 | -0.107 |
|     |       |       |        | 202 | → | 219 | 0.101  |
| 112 | 4.259 | 291.1 | 0.0054 | 203 | → | 219 | 0.360  |
|     |       |       |        | 199 | → | 215 | 0.285  |
|     |       |       |        | 202 | → | 219 | -0.229 |
|     |       |       |        | 205 | → | 219 | 0.216  |
|     |       |       |        | 200 | → | 215 | -0.171 |
|     |       |       |        | 204 | → | 219 | 0.166  |
|     |       |       |        | 195 | → | 219 | 0.142  |
|     |       |       |        | 206 | → | 219 | 0.133  |
| 113 | 4.288 | 289.2 | 0.0472 | 212 | → | 225 | 0.306  |

|     |       |       |        |     |   |     |        |
|-----|-------|-------|--------|-----|---|-----|--------|
|     |       |       |        | 213 | → | 226 | -0.274 |
|     |       |       |        | 213 | → | 225 | 0.234  |
|     |       |       |        | 198 | → | 214 | 0.220  |
|     |       |       |        | 198 | → | 216 | -0.197 |
|     |       |       |        | 213 | → | 227 | -0.174 |
|     |       |       |        | 213 | → | 231 | 0.157  |
|     |       |       |        | 209 | → | 225 | 0.151  |
|     |       |       |        | 212 | → | 231 | 0.144  |
| 114 | 4.291 | 288.9 | 0.0146 | 198 | → | 214 | 0.404  |
|     |       |       |        | 198 | → | 216 | -0.363 |
|     |       |       |        | 212 | → | 225 | -0.151 |
|     |       |       |        | 209 | → | 225 | -0.129 |
|     |       |       |        | 198 | → | 215 | 0.129  |
|     |       |       |        | 213 | → | 226 | 0.128  |
|     |       |       |        | 213 | → | 225 | -0.120 |
|     |       |       |        | 198 | → | 224 | 0.111  |
| 115 | 4.313 | 287.5 | 0.1012 | 209 | → | 225 | 0.513  |
|     |       |       |        | 209 | → | 231 | 0.229  |
|     |       |       |        | 200 | → | 215 | 0.147  |
|     |       |       |        | 209 | → | 223 | -0.144 |
|     |       |       |        | 210 | → | 224 | -0.128 |
|     |       |       |        | 199 | → | 215 | -0.121 |
| 116 | 4.324 | 286.8 | 0.0436 | 210 | → | 224 | 0.410  |
|     |       |       |        | 211 | → | 224 | 0.256  |
|     |       |       |        | 210 | → | 232 | -0.243 |
|     |       |       |        | 205 | → | 218 | 0.149  |
|     |       |       |        | 211 | → | 232 | -0.147 |
|     |       |       |        | 205 | → | 217 | 0.133  |
|     |       |       |        | 203 | → | 217 | 0.129  |
|     |       |       |        | 210 | → | 226 | -0.124 |
| 117 | 4.327 | 286.5 | 0.0019 | 205 | → | 218 | 0.487  |
|     |       |       |        | 205 | → | 217 | 0.386  |
|     |       |       |        | 202 | → | 217 | -0.140 |
|     |       |       |        | 209 | → | 225 | -0.121 |
|     |       |       |        | 210 | → | 224 | -0.117 |
| 118 | 4.346 | 285.3 | 0.0188 | 208 | → | 224 | 0.553  |
|     |       |       |        | 208 | → | 232 | -0.264 |
|     |       |       |        | 208 | → | 222 | -0.142 |
|     |       |       |        | 208 | → | 221 | 0.131  |
| 119 | 4.354 | 284.8 | 0.011  | 212 | → | 226 | 0.535  |
|     |       |       |        | 212 | → | 227 | 0.382  |
|     |       |       |        | 212 | → | 228 | -0.145 |
| 120 | 4.363 | 284.2 | 0.0062 | 204 | → | 218 | 0.465  |
|     |       |       |        | 204 | → | 217 | -0.345 |
|     |       |       |        | 203 | → | 217 | -0.318 |
|     |       |       |        | 203 | → | 219 | -0.103 |
| 121 | 4.372 | 283.6 | 0.0024 | 205 | → | 219 | 0.597  |
|     |       |       |        | 202 | → | 219 | 0.291  |
|     |       |       |        | 203 | → | 219 | -0.108 |

|     |       |       |        |     |   |     |        |
|-----|-------|-------|--------|-----|---|-----|--------|
| 122 | 4.387 | 282.6 | 0.0023 | 211 | → | 226 | 0.527  |
|     |       |       |        | 211 | → | 227 | -0.393 |
|     |       |       |        | 211 | → | 228 | -0.157 |
|     |       |       |        | 210 | → | 226 | -0.114 |
| 123 | 4.398 | 281.9 | 0.0197 | 210 | → | 226 | 0.432  |
|     |       |       |        | 210 | → | 227 | -0.317 |
|     |       |       |        | 203 | → | 217 | 0.251  |
|     |       |       |        | 204 | → | 218 | 0.163  |
|     |       |       |        | 204 | → | 217 | -0.135 |
|     |       |       |        | 210 | → | 228 | -0.123 |
| 124 | 4.405 | 281.5 | 0.0097 | 203 | → | 217 | 0.274  |
|     |       |       |        | 210 | → | 226 | -0.270 |
|     |       |       |        | 209 | → | 226 | -0.259 |
|     |       |       |        | 210 | → | 227 | 0.196  |
|     |       |       |        | 209 | → | 227 | -0.195 |
|     |       |       |        | 202 | → | 217 | -0.190 |
|     |       |       |        | 204 | → | 219 | 0.189  |
|     |       |       |        | 204 | → | 218 | 0.129  |
|     |       |       |        | 210 | → | 224 | -0.117 |
|     |       |       |        | 204 | → | 219 | 0.464  |
| 125 | 4.411 | 281.1 | 0.0148 | 209 | → | 226 | 0.346  |
|     |       |       |        | 209 | → | 227 | 0.256  |
|     |       |       |        | 203 | → | 219 | -0.207 |
|     |       |       |        | 203 | → | 217 | 0.101  |
|     |       |       |        | 209 | → | 228 | -0.100 |
| 126 | 4.413 | 280.9 | 0.0001 | 213 | → | 224 | 0.682  |
| 127 | 4.416 | 280.8 | 0.0191 | 204 | → | 219 | 0.133  |
|     |       |       |        | 204 | → | 219 | 0.344  |
|     |       |       |        | 209 | → | 226 | -0.310 |
|     |       |       |        | 203 | → | 217 | -0.263 |
|     |       |       |        | 209 | → | 227 | -0.227 |
|     |       |       |        | 203 | → | 218 | -0.148 |
|     |       |       |        | 204 | → | 217 | 0.136  |
|     |       |       |        | 213 | → | 224 | -0.133 |
|     |       |       |        | 203 | → | 219 | -0.127 |
|     |       |       |        | 202 | → | 217 | 0.103  |
|     |       |       |        | 204 | → | 218 | -0.102 |
| 128 | 4.450 | 278.6 | 0.4676 | 202 | → | 217 | 0.573  |
|     |       |       |        | 203 | → | 217 | 0.194  |
|     |       |       |        | 197 | → | 215 | -0.120 |
|     |       |       |        | 201 | → | 216 | 0.524  |
| 129 | 4.477 | 276.9 | 0.0043 | 201 | → | 214 | 0.435  |
| 130 | 4.488 | 276.2 | 0.0008 | 200 | → | 214 | 0.610  |
|     |       |       |        | 200 | → | 215 | 0.212  |
|     |       |       |        | 200 | → | 216 | 0.198  |
|     |       |       |        | 194 | → | 216 | 0.102  |
| 131 | 4.508 | 275.1 | 0.0004 | 212 | → | 224 | 0.700  |
| 132 | 4.515 | 274.6 | 0.0111 | 208 | → | 226 | 0.475  |
|     |       |       |        | 208 | → | 227 | -0.368 |

|     |       |       |        |     |   |     |        |
|-----|-------|-------|--------|-----|---|-----|--------|
|     |       |       |        | 203 | → | 218 | 0.198  |
|     |       |       |        | 208 | → | 228 | -0.154 |
|     |       |       |        | 197 | → | 214 | 0.146  |
|     |       |       |        | 197 | → | 216 | 0.122  |
| 133 | 4.515 | 274.6 | 0.0008 | 197 | → | 214 | 0.457  |
|     |       |       |        | 197 | → | 216 | 0.375  |
|     |       |       |        | 208 | → | 226 | -0.161 |
|     |       |       |        | 194 | → | 216 | -0.131 |
|     |       |       |        | 208 | → | 227 | 0.124  |
|     |       |       |        | 194 | → | 214 | -0.117 |
| 134 | 4.528 | 273.8 | 0.1838 | 203 | → | 218 | 0.569  |
|     |       |       |        | 208 | → | 226 | -0.177 |
|     |       |       |        | 203 | → | 219 | -0.161 |
|     |       |       |        | 202 | → | 218 | -0.150 |
|     |       |       |        | 208 | → | 227 | 0.133  |
|     |       |       |        | 203 | → | 217 | -0.110 |
| 135 | 4.535 | 273.4 | 0.0004 | 201 | → | 215 | 0.576  |
|     |       |       |        | 196 | → | 214 | -0.248 |
|     |       |       |        | 196 | → | 216 | -0.163 |
|     |       |       |        | 201 | → | 214 | -0.134 |
| 136 | 4.538 | 273.2 | 0.0322 | 202 | → | 218 | 0.597  |
|     |       |       |        | 203 | → | 217 | -0.147 |
|     |       |       |        | 202 | → | 219 | -0.146 |
|     |       |       |        | 197 | → | 215 | 0.129  |
|     |       |       |        | 203 | → | 218 | 0.114  |
| 137 | 4.545 | 272.8 | 0.0005 | 196 | → | 214 | 0.390  |
|     |       |       |        | 196 | → | 216 | 0.365  |
|     |       |       |        | 201 | → | 215 | 0.286  |
|     |       |       |        | 196 | → | 215 | 0.161  |
|     |       |       |        | 192 | → | 214 | 0.140  |
|     |       |       |        | 192 | → | 216 | 0.135  |
| 138 | 4.550 | 272.5 | 0.0013 | 200 | → | 216 | 0.590  |
|     |       |       |        | 199 | → | 214 | 0.195  |
|     |       |       |        | 200 | → | 214 | -0.156 |
|     |       |       |        | 197 | → | 216 | -0.154 |
|     |       |       |        | 194 | → | 214 | 0.105  |
| 139 | 4.567 | 271.5 | 0      | 211 | → | 225 | 0.602  |
|     |       |       |        | 210 | → | 225 | 0.357  |
| 140 | 4.569 | 271.4 | 0.0005 | 199 | → | 214 | 0.540  |
|     |       |       |        | 199 | → | 216 | 0.360  |
|     |       |       |        | 199 | → | 215 | 0.175  |
|     |       |       |        | 200 | → | 216 | -0.158 |
| 141 | 4.579 | 270.8 | 0      | 210 | → | 225 | 0.603  |
|     |       |       |        | 211 | → | 225 | -0.358 |
| 142 | 4.580 | 270.7 | 0      | 209 | → | 224 | 0.700  |
| 143 | 4.589 | 270.2 | 0      | 213 | → | 227 | 0.431  |
|     |       |       |        | 213 | → | 226 | -0.403 |
|     |       |       |        | 213 | → | 228 | -0.372 |
| 144 | 4.613 | 268.8 | 0.0121 | 201 | → | 217 | 0.530  |



|     |       |       |        |     |   |     |        |
|-----|-------|-------|--------|-----|---|-----|--------|
| 145 | 4.625 | 268.1 | 0.0144 | 201 | → | 218 | 0.420  |
|     |       |       |        | 200 | → | 217 | 0.522  |
|     |       |       |        | 200 | → | 218 | -0.415 |
| 146 | 4.653 | 266.5 | 0.0003 | 197 | → | 217 | -0.101 |
|     |       |       |        | 198 | → | 216 | 0.526  |
|     |       |       |        | 198 | → | 214 | 0.453  |
| 147 | 4.677 | 265.1 | 0      | 212 | → | 227 | 0.423  |
|     |       |       |        | 212 | → | 226 | -0.413 |
|     |       |       |        | 212 | → | 228 | -0.371 |
| 148 | 4.683 | 264.8 | 0.0002 | 199 | → | 216 | 0.582  |
|     |       |       |        | 199 | → | 214 | -0.324 |
|     |       |       |        | 199 | → | 215 | -0.114 |
| 149 | 4.706 | 263.5 | 0      | 200 | → | 216 | 0.111  |
|     |       |       |        | 211 | → | 227 | 0.416  |
|     |       |       |        | 211 | → | 226 | 0.415  |
| 150 | 4.708 | 263.3 | 0.0024 | 211 | → | 228 | 0.374  |
|     |       |       |        | 197 | → | 215 | 0.511  |
|     |       |       |        | 199 | → | 217 | 0.199  |
|     |       |       |        | 202 | → | 217 | 0.174  |
|     |       |       |        | 196 | → | 216 | 0.170  |
|     |       |       |        | 199 | → | 218 | -0.155 |
|     |       |       |        | 196 | → | 214 | -0.139 |
|     |       |       |        | 202 | → | 218 | -0.138 |
|     |       |       |        | 197 | → | 214 | -0.124 |

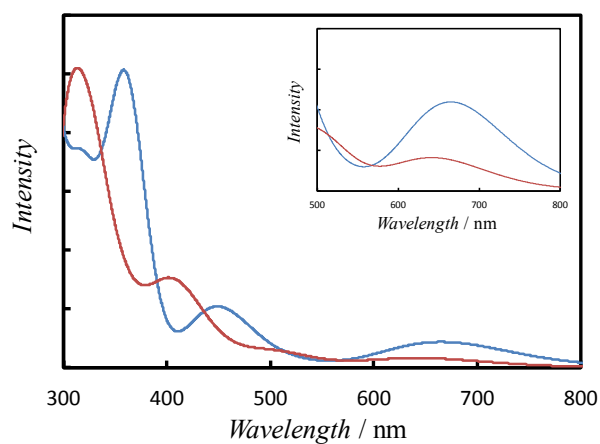

**Fig. S6** Theoretical UV/Vis spectra for **1** (red) and **5** (blue) in CH<sub>3</sub>CN calculated using the TDDFT method.
